# Supplementary material for: Whole genome characterization of thermophilic Campylobacter species isolated from dairy manure in small specialty crop farms of Northeast Ohio
Source: PubMed Central journal article supplement (PMC10071015; doi:10.3389/fmicb.2023.1074548), 2023-03-21
Supplement: Data_Sheet_1.pdf [file Data_Sheet_1.pdf]

## Supplementary Material

**Supplemental Table 1.** Whole genome sequencing results of the thermophilic *Campylobacter* isolates. N=13 *C. coli* and 56 *C. jejuni* isolates.

| <b><i>Campylobacter</i> species</b> | <b><i>C. coli</i> (mean[IC95%])</b> | <b><i>C. jejuni</i> (mean[IC95%])</b> |
|-------------------------------------|-------------------------------------|---------------------------------------|
| Number of contigs                   | 44 [19-69]                          | 39 [35-43]                            |
| Length (bp)                         | 1,691,610 [1,680,103-1,703,117]     | 1,683,112 [1,664,247-1,701,977]       |
| N50                                 | 138,085 [105,915-170,255]           | 132,935 [115,659-150,212]             |

**Supplemental Table 2.** Details about the *Campylobacter* isolates.

| Species   | NCBI ID | Year of collection | Month of collection | Farm ID | Farm cluster | ST    | CC  | # contigs | Genome size | Sequencing depth | N50    | Mean Length_R1 | Mean Length_R2 | Mean Q_R1 | Mean Q_R2 | Number of CDS |
|-----------|---------|--------------------|---------------------|---------|--------------|-------|-----|-----------|-------------|------------------|--------|----------------|----------------|-----------|-----------|---------------|
| <i>Cc</i> | 112127  | 2019               | 12                  | 8       | 2            | 1068  | 828 | 37        | 1712414     | 258              | 130748 | 158            | 158            | 36.5      | 36.3      | 1828          |
| <i>Cj</i> | 112130  | 2019               | 12                  | 9       | 3            | 403   | 403 | 41        | 1730330     | 159              | 159682 | 207            | 207            | 36.7      | 35.9      | 1904          |
| <i>Cc</i> | 112141  | 2020               | 3                   | 7       | 1            | 1068  | 828 | 26        | 1712508     | 194              | 177425 | 208            | 209            | 36.6      | 35.6      | 1837          |
| <i>Cc</i> | 112142  | 2020               | 3                   | 8       | 2            | 1068  | 828 | 29        | 1712828     | 258              | 162623 | 190            | 190            | 36.8      | 36.2      | 1838          |
| <i>Cj</i> | 112146  | 2020               | 5                   | 9       | 3            | 464   | 464 | 41        | 1690190     | 204              | 118700 | 224            | 224            | 37        | 36        | 1871          |
| <i>Cc</i> | 112149  | 2020               | 5                   | 7       | 1            | 829   | 828 | 31        | 1685584     | 212              | 149009 | 218            | 218            | 36.9      | 35.9      | 1823          |
| <i>Cj</i> | 112152  | 2020               | 5                   | 8       | 2            | 8     | 21  | 59        | 1677351     | 166              | 174488 | 203            | 204            | 36.8      | 35.9      | 1812          |
| <i>Cc</i> | 112154  | 2020               | 5                   | 8       | 2            | 1068  | 828 | 28        | 1714190     | 213              | 162597 | 226            | 227            | 36.9      | 35.5      | 1835          |
| <i>Cc</i> | 112156  | 2020               | 5                   | 34      | 5            | 1068  | 828 | 29        | 1712000     | 273              | 238715 | 215            | 215            | 36.9      | 35.9      | 1830          |
| <i>Cc</i> | 112158  | 2020               | 5                   | 7       | 1            | 829   | 828 | 31        | 1683322     | 209              | 159067 | 184            | 184            | 36.9      | 36.7      | 1819          |
| <i>Cj</i> | 112159  | 2020               | 5                   | 8       | 2            | 8     | 21  | 48        | 1650334     | 73.4             | 74419  | 206            | 206            | 36.5      | 36        | 1796          |
| <i>Cc</i> | 112160  | 2020               | 5                   | 34      | 5            | 829   | 828 | 42        | 1670714     | 105              | 96671  | 174            | 174            | 36.8      | 36.2      | 1809          |
| <i>Cc</i> | 112161  | 2020               | 6                   | 7       | 1            | 829   | 828 | 31        | 1683677     | 71.5             | 141590 | 181            | 181            | 36.6      | 35.9      | 1816          |
| <i>Cj</i> | 112164  | 2020               | 6                   | 8       | 2            | 929   | 21  | 49        | 1658617     | 82.9             | 79572  | 203            | 203            | 36.7      | 36.3      | 1820          |
| <i>Cj</i> | 112166  | 2020               | 7                   | 8       | 2            | 929   | 21  | 42        | 1655476     | 64.8             | 82666  | 194            | 194            | 36.7      | 36.3      | 1814          |
| <i>Cj</i> | 112167  | 2020               | 7                   | 8       | 2            | 929   | 21  | 69        | 1662280     | 85.4             | 79076  | 151            | 151            | 36.5      | 36.2      | 1819          |
| <i>Cc</i> | 112171  | 2020               | 7                   | 7       | 1            | 829   | 828 | 50        | 1680862     | 73.6             | 87226  | 191            | 191            | 36.8      | 36.3      | 1826          |
| <i>Cc</i> | 112172  | 2020               | 7                   | 8       | 2            | 829   | 828 | 179       | 1656321     | 24.5             | 15642  | 178            | 178            | 36.6      | 35.5      | 1860          |
| <i>Cc</i> | 112173  | 2020               | 7                   | 34      | 5            | 829   | 828 | 21        | 1683966     | 131              | 161488 | 191            | 192            | 36.9      | 35.3      | 1818          |
| <i>Cj</i> | 112177  | 2020               | 8                   | 7       | 1            | 5261  | 257 | 50        | 1762741     | 232              | 105461 | 157            | 157            | 36.7      | 36        | 1964          |
| <i>Cj</i> | 112180  | 2020               | 8                   | 8       | 2            | 8     | 21  | 31        | 1651930     | 182              | 174548 | 181            | 181            | 36.9      | 36.8      | 1794          |
| <i>Cc</i> | 112184  | 2020               | 8                   | 7       | 1            | 829   | 828 | 39        | 1682555     | 216              | 112311 | 185            | 185            | 36.9      | 36.4      | 1824          |
| <i>Cj</i> | 112913  | 2018               | 1                   | 1       | 1            | 11771 | 42  | 33        | 1762271     | 118              | 114572 | 195            | 196            | 36.2      | 33.8      | 1925          |
| <i>Cj</i> | 112917  | 2018               | 2                   | 1       | 1            | 267   | 283 | 32        | 1642110     | 182              | 129135 | 194            | 195            | 36.5      | 33.9      | 1742          |
| <i>Cj</i> | 112921  | 2018               | 3                   | 19      | 5            | 48    | 48  | 34        | 1710031     | 153              | 116332 | 198            | 199            | 36.5      | 34.2      | 1867          |
| <i>Cj</i> | 112922  | 2018               | 3                   | 17      | 2            | 8     | 21  | 30        | 1615799     | 167              | 182447 | 170            | 173            | 36.4      | 32.7      | 1736          |
| <i>Cj</i> | 112924  | 2018               | 3                   | 19      | 5            | 21    | 21  | 63        | 1757349     | 151              | 90220  | 189            | 191            | 36.4      | 32.3      | 1937          |
| <i>Cj</i> | 112925  | 2018               | 4                   | 11      | 4            | 42    | 42  | 50        | 1657537     | 173              | 148161 | 190            | 190            | 36.4      | 36.3      | 1821          |
| <i>Cj</i> | 112926  | 2018               | 4                   | 11      | 4            | 922   | 21  | 27        | 1634735     | 87.8             | 197356 | 209            | 209            | 35.9      | 35.9      | 1743          |
| <i>Cj</i> | 112927  | 2018               | 5                   | 1       | 1            | 459   | 42  | 36        | 1800378     | 124              | 108902 | 162            | 163            | 36.3      | 35.4      | 1978          |
| <i>Cj</i> | 112930  | 2018               | 5                   | 7       | 1            | 806   | 21  | 92        | 1873465     | 167              | 60119  | 154            | 154            | 36.2      | 35.3      | 2116          |
| <i>Cj</i> | 112932  | 2018               | 5                   | 17      | 2            | 8     | 21  | 39        | 1614640     | 126              | 98111  | 172            | 172            | 36.2      | 36.2      | 1745          |

|    |        |      |    |    |   |      |     |    |         |      |        |     |     |      |      |      |
|----|--------|------|----|----|---|------|-----|----|---------|------|--------|-----|-----|------|------|------|
| Cj | 112935 | 2018 | 7  | 1  | 1 | 922  | 21  | 43 | 1637610 | 163  | 92304  | 181 | 181 | 36.3 | 36.1 | 1751 |
| Cj | 112936 | 2018 | 7  | 9  | 3 | 806  | 21  | 52 | 1823936 | 145  | 85847  | 163 | 163 | 36.3 | 35.2 | 2051 |
| Cj | 112944 | 2019 | 1  | 17 | 2 | 459  | 42  | 52 | 1765194 | 114  | 103258 | 174 | 174 | 36.3 | 35.2 | 1941 |
| Cj | 112949 | 2019 | 2  | 26 | 1 | 922  | 21  | 68 | 1686980 | 142  | 98215  | 167 | 168 | 36.2 | 34   | 1804 |
| Cj | 112953 | 2019 | 2  | 30 | 3 | 61   | 61  | 18 | 1611071 | 98.3 | 377770 | 175 | 179 | 36.4 | 31.9 | 1753 |
| Cj | 112957 | 2019 | 2  | 11 | 4 | 52   | 52  | 55 | 1598509 | 195  | 98736  | 163 | 167 | 36.1 | 32.4 | 1739 |
| Cj | 112958 | 2019 | 2  | 26 | 1 | 922  | 21  | 59 | 1681245 | 171  | 95146  | 200 | 200 | 36.4 | 36.3 | 1814 |
| Cj | 112960 | 2019 | 2  | 17 | 2 | 459  | 42  | 34 | 1768738 | 146  | 114505 | 202 | 202 | 36.5 | 35.9 | 1950 |
| Cj | 112961 | 2019 | 3  | 26 | 1 | 922  | 21  | 48 | 1682222 | 243  | 99116  | 202 | 202 | 36.6 | 36.2 | 1806 |
| Cj | 112962 | 2019 | 3  | 30 | 3 | 61   | 61  | 18 | 1612444 | 230  | 168783 | 186 | 187 | 36.5 | 36.2 | 1757 |
| Cj | 112967 | 2019 | 3  | 7  | 1 | 45   | 45  | 27 | 1637612 | 116  | 136755 | 200 | 200 | 36.4 | 35.7 | 1713 |
| Cj | 112968 | 2019 | 3  | 30 | 3 | 45   | 45  | 34 | 1634642 | 195  | 127155 | 181 | 181 | 36.5 | 35   | 1713 |
| Cj | 112969 | 2019 | 3  | 7  | 1 | 42   | 42  | 22 | 1650130 | 56.2 | 155132 | 217 | 217 | 36.3 | 34.1 | 1793 |
| Cj | 112970 | 2019 | 3  | 26 | 1 | 922  | 21  | 28 | 1637177 | 162  | 447899 | 208 | 208 | 36.5 | 35.8 | 1750 |
| Cj | 112971 | 2019 | 4  | 17 | 2 | 1244 | 61  | 27 | 1708668 | 131  | 116155 | 215 | 216 | 36.7 | 35.7 | 1877 |
| Cj | 112974 | 2019 | 4  | 26 | 1 | 922  | 21  | 30 | 1635508 | 167  | 154529 | 220 | 220 | 36.6 | 35.4 | 1750 |
| Cj | 112979 | 2019 | 4  | 11 | 4 | 52   | 52  | 33 | 1599234 | 154  | 181186 | 222 | 222 | 36.5 | 35.5 | 1725 |
| Cj | 112980 | 2019 | 4  | 26 | 1 | 52   | 52  | 32 | 1598761 | 162  | 118671 | 224 | 224 | 36.6 | 34.9 | 1722 |
| Cj | 112981 | 2019 | 5  | 17 | 2 | 459  | 42  | 35 | 1769103 | 103  | 114386 | 228 | 228 | 36.5 | 34.8 | 1948 |
| Cj | 112985 | 2019 | 5  | 30 | 3 | 21   | 21  | 28 | 1663450 | 89.4 | 147015 | 221 | 221 | 36.3 | 35.7 | 1811 |
| Cj | 112990 | 2019 | 5  | 7  | 1 | 61   | 61  | 17 | 1611513 | 82.3 | 122876 | 221 | 221 | 36.1 | 35.8 | 1749 |
| Cj | 112991 | 2019 | 5  | 30 | 3 | 61   | 61  | 27 | 1611575 | 163  | 154933 | 158 | 159 | 36.4 | 35.9 | 1741 |
| Cj | 112992 | 2019 | 6  | 17 | 2 | 806  | 21  | 41 | 1849238 | 129  | 98715  | 192 | 192 | 36.6 | 35.9 | 2072 |
| Cj | 112998 | 2019 | 6  | 26 | 1 | 45   | 45  | 36 | 1634818 | 182  | 107481 | 167 | 167 | 36.4 | 36.5 | 1714 |
| Cj | 112999 | 2019 | 7  | 7  | 1 | 922  | 21  | 35 | 1634014 | 163  | 162464 | 179 | 179 | 36.6 | 36.5 | 1747 |
| Cj | 113000 | 2019 | 7  | 26 | 1 | 604  | 42  | 51 | 1627489 | 122  | 53847  | 192 | 192 | 36.5 | 36.1 | 1756 |
| Cj | 113001 | 2019 | 7  | 30 | 3 | 61   | 61  | 25 | 1610973 | 98.9 | 109892 | 186 | 186 | 36.5 | 36.1 | 1755 |
| Cj | 113002 | 2019 | 7  | 26 | 1 | 922  | 21  | 42 | 1681246 | 80.2 | 107561 | 211 | 211 | 36.5 | 35.3 | 1799 |
| Cj | 113003 | 2019 | 7  | 30 | 3 | 61   | 61  | 18 | 1611373 | 118  | 175368 | 158 | 159 | 36.4 | 35.1 | 1743 |
| Cj | 113004 | 2019 | 8  | 17 | 2 | 982  | 21  | 36 | 1695487 | 261  | 109963 | 178 | 179 | 36.5 | 35.7 | 1859 |
| Cj | 113005 | 2019 | 8  | 26 | 1 | 982  | 21  | 29 | 1695774 | 167  | 115645 | 195 | 195 | 36.6 | 36.4 | 1858 |
| Cj | 113007 | 2019 | 8  | 30 | 3 | 61   | 61  | 30 | 1610024 | 196  | 107152 | 196 | 196 | 36.6 | 35.9 | 1758 |
| Cj | 113015 | 2019 | 9  | 26 | 1 | 922  | 21  | 41 | 1681228 | 378  | 149097 | 186 | 186 | 36.6 | 36.2 | 1800 |
| Cj | 113016 | 2019 | 9  | 17 | 2 | 806  | 21  | 41 | 1827031 | 121  | 154473 | 222 | 222 | 36.6 | 35.7 | 2054 |
| Cj | 113225 | 2020 | 10 | 8  | 2 | 403  | 403 | 33 | 1733602 | 218  | 192307 | 211 | 212 | 36.9 | 36.4 | 1908 |
| Cj | 113229 | 2020 | 10 | 7  | 1 | 5261 | 257 | 32 | 1761187 | 214  | 107458 | 182 | 182 | 37   | 36.7 | 1965 |

|           |        |      |    |   |   |       |    |    |         |     |       |     |     |    |      |      |
|-----------|--------|------|----|---|---|-------|----|----|---------|-----|-------|-----|-----|----|------|------|
| <i>Cj</i> | 113230 | 2020 | 10 | 8 | 2 | 11712 | 42 | 41 | 1767923 | 134 | 88638 | 212 | 212 | 37 | 36.2 | 1947 |
|-----------|--------|------|----|---|---|-------|----|----|---------|-----|-------|-----|-----|----|------|------|

*Cj* and *Cc*: *Campylobacter jejuni* and *coli*, respectively. CC: clonal complex. ST: sequence type. N50: sequence length of the shortest contig at 50% of the total genome length. Mean Q: average base calling accuracy. R1 and R2: forward and reverse reads, respectively. CDS: coding sequences.

**Supplemental Table 3.** Protein encoding genes unique to *Campylobacter jejuni* (n=56 isolates) or *Campylobacter coli* (n=13 isolates).

| Protein-encoding gene function                                             | Comment                                                     |
|----------------------------------------------------------------------------|-------------------------------------------------------------|
| Methyl accepting chemotaxis protein                                        |                                                             |
| Methyl accepting chemotaxis sensor/transducer protein                      |                                                             |
| Putative MCP domain signal transduction protein                            |                                                             |
| CopG protein                                                               |                                                             |
| Periplasmic dsDNA and ssDNA binding protein contributing to transformation |                                                             |
| Osmosensitive K <sup>+</sup> channel histidine kinase KdpD                 |                                                             |
| Potassium transporting ATPase A chain (EC 3.6.3.12) (TC 3.A.3.7.1)         |                                                             |
| Potassium transporting ATPase B chain (EC 3.6.3.12) (TC 3.A.3.7.1)         |                                                             |
| Potassium transporting ATPase C chain (EC 3.6.3.12) (TC 3.A.3.7.1)         |                                                             |
| RepA protein homolog                                                       |                                                             |
| Inosine uridine preferring nucleoside hydrolase (EC 3.2.2.1)               |                                                             |
| Major antigenic peptide PEB3                                               |                                                             |
| Small hydrophobic protein Cj0260c                                          |                                                             |
| N linked glycosylation glycosyltransferase PglG                            |                                                             |
| Transcriptional regulator, HxlR family                                     |                                                             |
| Putative secreted serine protease (EC 3.4.21.)                             |                                                             |
| serine protease pet                                                        |                                                             |
| Beta 1,4 N acetylgalactosaminyltransferase (EC 2.4.1.)                     |                                                             |
| 2 oxoglutarate/malate translocator                                         |                                                             |
| Gluconate 2 dehydrogenase (EC 1.1.99.3), membrane bound, flavoprotein      |                                                             |
| Gluconate 2 dehydrogenase (EC 1.1.99.3), membrane bound, gamma subunit     |                                                             |
| Surface exposed lipoprotein JlpA                                           |                                                             |
| CRISPR associated endonuclease Cas9                                        | Genes only detected in <i>Campylobacter jejuni</i> isolates |
| CRISPR associated protein Cas1                                             |                                                             |

|                                                                                             |                                                           |
|---------------------------------------------------------------------------------------------|-----------------------------------------------------------|
| CRISPR associated protein Cas2                                                              |                                                           |
| Cytochrome c family protein                                                                 |                                                           |
| Heterodisulfide reductase subunit B like protein @ Putative succinate dehydrogenase subunit |                                                           |
| Succinate dehydrogenase flavoprotein subunit (EC 1.3.5.1)                                   |                                                           |
| Succinate dehydrogenase iron sulfur protein (EC 1.3.5.1)                                    |                                                           |
| putative molybdenum containing oxidoreductase                                               |                                                           |
| Probable sulfite oxidase                                                                    |                                                           |
| putative 2 pyrone 4,6 dicarboxylic acid hydrolase                                           |                                                           |
| Putative arylsulfate sulfotransferase (EC 2.8.2.22)                                         |                                                           |
| Hippurate hydrolase (EC 3.5.1.32)                                                           |                                                           |
| RidA/YER057c/UK114 superfamily, group 2, YoaB                                               |                                                           |
| Cj0990c                                                                                     |                                                           |
| jhp1395                                                                                     |                                                           |
| Cj0186c Integral membrane protein TerC                                                      |                                                           |
| LSU ribosomal protein L36p @ LSU ribosomal protein L36p, zinc dependent                     |                                                           |
| Citrate/H <sup>+</sup> symporter of CitMHS family                                           |                                                           |
| CoA binding domain protein                                                                  |                                                           |
| Di tripeptide/cation symporter                                                              |                                                           |
| DNA transfer protein                                                                        |                                                           |
| Putative processing peptidase                                                               |                                                           |
| Family of unknown function (DUF450) family                                                  |                                                           |
| FIG001614: Membrane protein                                                                 |                                                           |
| FIG00470841: hypothetical protein                                                           |                                                           |
| FIG015373: Membrane protein                                                                 |                                                           |
| Arsenate reductase (EC 1.20.4.4) thioredoxin-coupled, LMWP family                           |                                                           |
| Arsenical-resistance protein ACR3                                                           |                                                           |
| probable periplasmic protein Cj0413 , putative                                              |                                                           |
| Penicillin-insensitive transglycosylase (EC 2.4.2.-) & transpeptidase PBP-1C                |                                                           |
|                                                                                             | Genes only detected in <i>Campylobacter coli</i> isolates |

|                                                                                                                            |
|----------------------------------------------------------------------------------------------------------------------------|
| Conjugative transfer protein TrbL                                                                                          |
| Sulfate adenylyltransferase subunit 1 (EC 2.7.7.4) / Sulfate permease, Trk-type                                            |
| Sulfate adenylyltransferase subunit 2 (EC 2.7.7.4)                                                                         |
| Tricarboxylate transport protein TctB                                                                                      |
| Tripartite tricarboxylate transporter TctA family                                                                          |
| Tripartite tricarboxylate transporter TctC family                                                                          |
| Capsular polysaccharide synthesis protein                                                                                  |
| Cell wall-associated hydrolase                                                                                             |
| Protein-methionine-sulfoxide reductase catalytic subunit MsrP                                                              |
| Putative polysaccharide deacetylase                                                                                        |
| Putative methyl-accepting chemotaxis protein                                                                               |
| SAM-dependent methyltransferase                                                                                            |
| lipopolysaccharide core biosynthesis protein LpsA                                                                          |
| UPF0053 inner membrane protein YgdQ; S-adenosylmethionine synthetase (Methionineadenosyltransferase AdoMet synthetase MAT) |
| UDP-glucose 6-dehydrogenase (EC 1.1.1.22)                                                                                  |
| 2-methylcitrate dehydratase (EC 4.2.1.79)                                                                                  |
| 2-methylcitrate synthase (EC 2.3.3.5)                                                                                      |
| 4-cresol dehydrogenase [hydroxylating] flavoprotein subunit (EC 1.17.99.1)                                                 |
| Adenine-specific DNA methyltransferase                                                                                     |
| Adenylylsulfate kinase (EC 2.7.1.25)                                                                                       |
| AgrC, putative                                                                                                             |
| Aliphatic amidase AmiE (EC 3.5.1.4)                                                                                        |
| Metal chaperone, involved in Zn homeostasis                                                                                |
| Peroxide stress regulator / Ferric uptake regulation protein                                                               |
| Uncharacterized metal ion transporter YcsG, Mn(2+)/Fe(2+) NRAMP family                                                     |
| sarcosine oxidase, putative                                                                                                |
| Methylisocitrate lyase (EC 4.1.3.30)                                                                                       |
| Alternative cytochrome c oxidase polypeptide CoxO (EC 1.9.3.1)                                                             |

|                                                                                             |
|---------------------------------------------------------------------------------------------|
| sodium/pantothenate symporter , putative                                                    |
| UDP-glucuronate decarboxylase (EC 4.1.1.35)                                                 |
| Channel-forming transporter/cytolysins activator of TpsB family                             |
| DnaJ-related protein                                                                        |
| Hemerythrin-like iron-binding protein                                                       |
| L-carnitine dehydratase/bile acid-inducible protein F                                       |
| Methionine synthase II (cobalamin-independent)                                              |
| Permease of the drug/metabolite transporter (DMT) superfamily                               |
| Phosphonate ABC transporter phosphate-binding periplasmic component (TC 3.A.1.9.1)          |
| Putative large exoprotein involved in heme utilization or adhesion of ShlA/HecA/FhaA family |
| Putative MCP-type signal transduction protein                                               |
| Tat (twin-arginine translocation) pathway signal sequence domain protein                    |
| integral membrane protein                                                                   |
| integral membrane protein, putative                                                         |
| Citrate lyase beta chain (EC 4.1.3.6)                                                       |
| Inner membrane protein CreD-like protein                                                    |
| Inner membrane protein YihN                                                                 |
| Inner membrane protein YihY, formerly thought to be RNase BN                                |
| probable integral membrane protein Cj0564 - related protein                                 |
| Acetate permease ActP (cation/acetate symporter)                                            |
| AzlC family protein                                                                         |
| Branched-chain amino acid transport protein, putative                                       |
| CAAX amino terminal protease family protein                                                 |
| COGs COG3777                                                                                |
| Dienelactone hydrolase and related enzymes                                                  |
| glcG protein                                                                                |
| Hemolysin, putative                                                                         |
| Leader peptidase (Prepilin peptidase) (EC 3.4.23.43)                                        |



|                                                                          |
|--------------------------------------------------------------------------|
| major facilitator family transporter, putative                           |
| membrane protein                                                         |
| Propionate--CoA ligase (EC 6.2.1.17); Acetyl-CoA synthetase (EC 6.2.1.1) |
| RecD-like DNA helicase YrrC                                              |
| Ribosomal RNA adenine dimethylase                                        |
| Tgh102                                                                   |
| TM2 domain family                                                        |
| transcriptional regulator, Crp/Fnr family                                |
| Uncharacterized NAD(P)H oxidoreductase, YdeQ/YrkL/YwrO family            |
| UPF0033 protein YeeD; Putative sulfur carrier protein YeeD               |
| UPF0317 protein YcsI                                                     |
| UPF0394 inner membrane protein YeeE                                      |
| FIG00469465: hypothetical protein                                        |
| FIG00469601: hypothetical protein                                        |
| FIG00469817: hypothetical protein                                        |
| FIG00469900: hypothetical protein                                        |
| FIG00469923: hypothetical protein                                        |
| FIG00470545: hypothetical protein                                        |
| FIG00470755: hypothetical protein                                        |
| FIG00472317: hypothetical protein                                        |
| FIG00710175: hypothetical protein                                        |

**Supplemental Table 4.** Protein encoding genes belonging to *Campylobacter jejuni* (n=56 isolates) variable genomes.

| Cluster | Protein-encoding gene                                                                              |
|---------|----------------------------------------------------------------------------------------------------|
| Cj1     | Beta-1,4-N-acetylgalactosaminyltransferase (EC 2.4.1.-)                                            |
| Cj1     | Biotin sulfoxide reductase (EC 1.-.-) / Free methionine-(S)-sulfoxide reductase                    |
| Cj1     | Cytidine diphosphoramidate kinase Cj1415                                                           |
| Cj1     | FIG00469638: hypothetical protein                                                                  |
| Cj1     | gamma-Glutamyl-CDP-amidate hydrolase involved in O-methyl phosphoramidate capsule modification     |
| Cj1     | Homolog of BLC protein                                                                             |
| Cj1     | L-glutamine kinase involved in O-methyl phosphoramidate capsule modification                       |
| Cj1     | Methyltransferase (EC 2.1.1.-), possibly involved in O-methyl phosphoramidate capsule modification |
| Cj1     | Peptide-methionine (R)-S-oxide reductase MsrB (EC 1.8.4.12)                                        |
| Cj1     | Phosphoglutamine cytidyltransferase (EC 2.7.7.-) in O-methyl phosphoramidate capsule modification  |
| Cj1     | Phosphoglycerol transferase-like protein                                                           |
| Cj1     | Predicted D-lactate dehydrogenase, Fe-S protein, FAD/FMN-containing                                |
| Cj1     | Predicted glycosyltransferase involved in capsule biosynthesis                                     |
| Cj1     | Pseudaminic acid biosynthesis protein PseA, possible Pse5Ac7Ac acetamidino synthase                |
| Cj1     | putative cytochrome C-type haem-binding periplasmic protein                                        |
| Cj1     | Similar to imidazole glycerol phosphate synthase amidotransferase subunit (LPS cluster)            |
| Cj1     | Similar to imidazole glycerol phosphate synthase cyclase subunit (LPS cluster)                     |
| Cj1     | Zinc transporter ZupT                                                                              |
| Cj2     | 3-oxoacyl-[acyl-carrier-protein] synthase, KASIII (EC 23141)                                       |
| Cj2     | Anaerobic dimethyl sulfoxide reductase chain A (EC 1853), molybdopterin-binding domain             |
| Cj2     | Anaerobic dimethyl sulfoxide reductase chain B (EC 1853), iron-sulfur binding subunit              |
| Cj2     | Anaerobic dimethyl sulfoxide reductase chain C (EC 1853), anchor subunit                           |
| Cj2     | Anaerobic dimethyl sulfoxide reductase chaperone DmsD                                              |
| Cj2     | CDP-4-dehydro-6-deoxy-D-glucose 3-dehydratase (EC 421-)                                            |
| Cj2     | death-on-curing family protein                                                                     |

|     |                                                                                    |
|-----|------------------------------------------------------------------------------------|
| Cj2 | FIG00469988: hypothetical protein                                                  |
| Cj2 | FIG00470572: hypothetical protein                                                  |
| Cj2 | FIG00472892: hypothetical protein                                                  |
| Cj2 | Hypothetical protein Cj1300                                                        |
| Cj2 | methyltransferase FkbM family                                                      |
| Cj2 | Oxidoreductase, aldo/keto reductase family                                         |
| Cj2 | Tgh088                                                                             |
| Cj2 | TraG-like protein                                                                  |
| Cj2 | UDP-N-acetyl-D-mannosamine dehydrogenase (EC 111336)                               |
| Cj2 | UDP-N-acetylglucosamine 2-epimerase (EC 51314)                                     |
| Cj2 | Uncharacterized protein ImpH/VasB                                                  |
| Cj3 | 3-methyl-2-oxobutanoate hydroxymethyltransferase (EC 2.1.2.11)                     |
| Cj3 | ABC transporter, permease protein 1 (cluster 1, maltose/g3p/polyamine/iron)        |
| Cj3 | ABC transporter, substrate-binding protein (cluster 1, maltose/g3p/polyamine/iron) |
| Cj3 | Aspartate 1-decarboxylase (EC 4.1.1.11)                                            |
| Cj3 | Bacteriocin resistance protein; peptidase C39                                      |
| Cj3 | D-glycero-alpha-D-manno-heptose 1-phosphate guanylyltransferase (EC 2.7.7.71)      |
| Cj3 | D-glycero-alpha-D-manno-heptose 7-phosphate kinase (EC 2.7.1.168)                  |
| Cj3 | dTDP-4-dehydrorhamnose 3,5-epimerase (EC 5.1.3.13)                                 |
| Cj3 | Ferric iron ABC transporter, ATP-binding protein                                   |
| Cj3 | FIG00973752: TolA-like membrane protein                                            |
| Cj3 | GDP-L-fucose synthetase (EC 1.1.1.271)                                             |
| Cj3 | GDP-mannose 4,6-dehydratase (EC 4.2.1.47)                                          |
| Cj3 | Pantoate--beta-alanine ligase (EC 6.3.2.1)                                         |
| Cj3 | Putative hemolysin activation/secretion protein                                    |
| Cj3 | Putative secreted serine protease (EC 3.4.21.-)                                    |
| Cj3 | serine protease pet                                                                |
| Cj4 | 3',5'-cyclic-nucleotide phosphodiesterase (EC 3.1.4.17)                            |

|     |                                                                                                       |
|-----|-------------------------------------------------------------------------------------------------------|
| Cj4 | Arsenate reductase (EC 1.20.4.4) thioredoxin-coupled, LMWP family                                     |
| Cj4 | Arsenical-resistance protein ACR3                                                                     |
| Cj4 | Class D beta-lactamase (EC 3.5.2.6) => OXA-184 family                                                 |
| Cj4 | FIG00471540: hypothetical protein                                                                     |
| Cj4 | FIG00471788: hypothetical protein                                                                     |
| Cj4 | Glycerol-3-phosphate ABC transporter, periplasmic glycerol-3-phosphate-binding protein (TC 3.A.1.1.3) |
| Cj4 | HAD-superfamily hydrolase, subfamily IA, variant 1                                                    |
| Cj4 | Histidinol-phosphate aminotransferase (EC 2.6.1.9)                                                    |
| Cj4 | Hypothetical protein Cj1433c                                                                          |
| Cj4 | hypothetical protein; Some similarities with formyltransferase                                        |
| Cj4 | Inner membrane protein YihN                                                                           |
| Cj4 | Methyltransferase, FkbM family protein                                                                |
| Cj4 | N-Acetyl-D-glucosamine ABC transport system, permease protein 1                                       |
| Cj4 | Na <sup>+</sup> /H <sup>+</sup> antiporter                                                            |
| Cj4 | Putative sugar transferase                                                                            |
| Cj4 | radical SAM domain protein protein                                                                    |
| Cj4 | Transcriptional regulator, Xre family                                                                 |
| Cj4 | Type III restriction-modification system DNA endonuclease res (EC 3.1.21.5)                           |
| Cj4 | UDP-galactopyranose mutase (EC 5.4.99.9)                                                              |
| Cj4 | UDP-glucose 6-dehydrogenase (EC 1.1.1.22)                                                             |
| Cj4 | UDP-glucuronate decarboxylase (EC 4.1.1.35)                                                           |
| Cj4 | Zn peptidase                                                                                          |
| Cj5 | Ferric siderophore transport system, biopolymer transport protein ExbD                                |
| Cj5 | FIG00470143: hypothetical protein                                                                     |
| Cj5 | FIG00545237: hypothetical protein                                                                     |
| Cj5 | FIG00638667: hypothetical protein                                                                     |
| Cj5 | FIG00732228: membrane protein                                                                         |
| Cj5 | GDP-2-acetamido-2,6-dideoxy-alpha-D-xylo-hexos-4-ulose aminotransferase [PLP]                         |

|     |                                                                                                                                                    |
|-----|----------------------------------------------------------------------------------------------------------------------------------------------------|
| Cj5 | GDP-N-acetylglucosamine 4,6-dehydratase [NAD+]                                                                                                     |
| Cj5 | Glucosamine-1-phosphate guanylyltransferase                                                                                                        |
| Cj5 | Glutamine--fructose-6-phosphate transaminase (isomerizing), glutaminase subunit (EC 26116)                                                         |
| Cj5 | Glutamine--fructose-6-phosphate transaminase (isomerizing), isomerase subunit (EC 26116)                                                           |
| Cj5 | ISCCo1, transposase orfB                                                                                                                           |
| Cj5 | Legionaminic acid biosynthesis protein PtmG                                                                                                        |
| Cj5 | LSU rRNA ## 23S rRNA, large subunit ribosomal RNA                                                                                                  |
| Cj5 | N,N'-diacetyllegionaminic acid synthase (EC 251101)                                                                                                |
| Cj5 | Possible restriction /modification enzyme                                                                                                          |
| Cj5 | Probable membrane protein Cj0124c                                                                                                                  |
| Cj5 | Putative H-T-H containing protein                                                                                                                  |
| Cj5 | Putative integral membrane protein                                                                                                                 |
| Cj5 | Putative lipoprotein, similar to CjrA of Escherichia coli O164                                                                                     |
| Cj5 | Putative outer membrane siderophore receptor                                                                                                       |
| Cj5 | Type I restriction-modification system, DNA-methyltransferase subunit M (EC 21172) / Type I restriction-modification system, specificity subunit S |
| Cj5 | UDP-N,N'-diacetylbacillosamine 2-epimerase (hydrolyzing) (EC 321184)                                                                               |
| Cj6 | Aldehyde dehydrogenase A (EC 12122) @ Glycolaldehyde dehydrogenase (EC 12121)                                                                      |
| Cj6 | Altronate dehydratase (EC 4217)                                                                                                                    |
| Cj6 | Dihydrodipicolinate synthase family                                                                                                                |
| Cj6 | FIG00469761: hypothetical protein                                                                                                                  |
| Cj6 | First ORF in transposon ISC1904                                                                                                                    |
| Cj6 | Fucose permease                                                                                                                                    |
| Cj6 | L-fuco-beta-pyranose dehydrogenase, type 2 (EC 1111122)                                                                                            |
| Cj6 | L-fuconolactone hydrolase                                                                                                                          |
| Cj6 | L-fucose mutarotase (EC 51329)                                                                                                                     |
| Cj6 | Mobile element protein                                                                                                                             |
| Cj6 | Probable lipoprotein Cj0818-related protein                                                                                                        |

|     |                                                                                                   |
|-----|---------------------------------------------------------------------------------------------------|
| Cj6 | Transcriptional regulator, IclR family                                                            |
| Cj7 | 4-carboxymuconolactone decarboxylase (EC 4.1.1.44)                                                |
| Cj7 | Beta-1,3-glucosyltransferase                                                                      |
| Cj7 | Beta-1,4-galactosyltransferase                                                                    |
| Cj7 | capsular polysaccharide biosynthesis protein, putative                                            |
| Cj7 | conserved hypothetical protein                                                                    |
| Cj7 | Conserved putative membrane protein precursor                                                     |
| Cj7 | DNA methylase N-4/N-6 domain protein                                                              |
| Cj7 | dTDP-3-amino-3,6-dideoxy-alpha-D-galactopyranose 3-N-acetyltransferase (EC 2.3.1.197)             |
| Cj7 | dTDP-3-amino-3,6-dideoxy-alpha-D-galactopyranose transaminase (EC 2.6.1.90)                       |
| Cj7 | dTDP-6-deoxy-3,4-keto-hexulose isomerase (EC 5.3.2.3)                                             |
| Cj7 | dTDP-glucose 4,6-dehydratase (EC 4.2.1.46)                                                        |
| Cj7 | FIG00470547: hypothetical protein                                                                 |
| Cj7 | FIG00470593: hypothetical protein                                                                 |
| Cj7 | FIG00470597: hypothetical protein                                                                 |
| Cj7 | FIG00470843: hypothetical protein                                                                 |
| Cj7 | FIG00471415: hypothetical protein                                                                 |
| Cj7 | FIG00896760: hypothetical protein                                                                 |
| Cj7 | Glucose-1-phosphate thymidyltransferase (EC 2.7.7.24)                                             |
| Cj7 | Guanine/hypoxanthine permease                                                                     |
| Cj7 | Homoserine O-succinyltransferase (EC 2.3.1.46)                                                    |
| Cj7 | Long-chain-fatty-acid--CoA ligase (EC 6.2.1.3)                                                    |
| Cj7 | MobC-like protein                                                                                 |
| Cj7 | O-acetylhomoserine sulfhydrylase (EC 2.5.1.49) @ O-succinylhomoserine sulfhydrylase (EC 2.5.1.48) |
| Cj7 | Oxidoreductase, short-chain dehydrogenase/reductase family                                        |
| Cj7 | Predicted hydrolase of the alpha/beta superfamily                                                 |
| Cj7 | putative butyryltransferase                                                                       |
| Cj7 | Putative transferase                                                                              |

|     |                                                                                                                                                                                           |
|-----|-------------------------------------------------------------------------------------------------------------------------------------------------------------------------------------------|
| Cj7 | Putative transporter                                                                                                                                                                      |
| Cj7 | Pyrrolidone-carboxylate peptidase (EC 3.4.19.3)                                                                                                                                           |
| Cj7 | Transporter, LysE family                                                                                                                                                                  |
| Cj7 | transposase                                                                                                                                                                               |
| Cj7 | ulcer associated adenine specific DNA methyltransferase                                                                                                                                   |
| Cj8 | ATPase required for both assembly of type IV secretion complex and secretion of T-DNA complex, VirB11                                                                                     |
| Cj8 | Coupling protein VirD4, ATPase required for T-DNA transfer                                                                                                                                |
| Cj8 | DNA primase TraC, putative                                                                                                                                                                |
| Cj8 | DNA topoisomerase III, TraE-type (EC 59912)                                                                                                                                               |
| Cj8 | FIG00471065: hypothetical protein                                                                                                                                                         |
| Cj8 | helicase, Snf2 family                                                                                                                                                                     |
| Cj8 | IncQ plasmid conjugative transfer DNA nicking endonuclease TraR (pTi VirD2 homolog)                                                                                                       |
| Cj8 | IncQ plasmid conjugative transfer protein TraG                                                                                                                                            |
| Cj8 | IncQ plasmid conjugative transfer protein TraQ (RP4 TrbM homolog)                                                                                                                         |
| Cj8 | Inner membrane protein forms channel for type IV secretion of T-DNA complex, VirB3 / ATPase required for both assembly of type IV secretion complex and secretion of T-DNA complex, VirB4 |
| Cj8 | Inner membrane protein forms channel for type IV secretion of T-DNA complex, VirB8                                                                                                        |
| Cj8 | Inner membrane protein of type IV secretion of T-DNA complex, TonB-like, VirB10                                                                                                           |
| Cj8 | Inner membrane protein of type IV secretion of T-DNA complex, VirB6                                                                                                                       |
| Cj8 | Lipoprotein of type IV secretion complex that spans outer membrane and periplasm, VirB7                                                                                                   |
| Cj8 | Major pilus subunit of type IV secretion complex, VirB2                                                                                                                                   |
| Cj8 | Minor pilin of type IV secretion complex, VirB5                                                                                                                                           |
| Cj8 | Outer membrane and periplasm component of type IV secretion of T-DNA complex, has secretin-like domain, VirB9                                                                             |
| Cj8 | Replication protein                                                                                                                                                                       |
| Cj8 | Site-specific recombinase, resolvase family                                                                                                                                               |
| Cj9 | Conjugative transfer transglycosylase                                                                                                                                                     |
| Cj9 | conserved hypothetical protein TIGR01671                                                                                                                                                  |
| Cj9 | DNA primase (EC 277-)                                                                                                                                                                     |

|      |                                                                                                      |
|------|------------------------------------------------------------------------------------------------------|
| Cj9  | F-box DNA helicase 1                                                                                 |
| Cj9  | FIG00470684: hypothetical protein                                                                    |
| Cj9  | FIG00471323: hypothetical protein                                                                    |
| Cj9  | FIG00471953: hypothetical protein                                                                    |
| Cj9  | IncF plasmid conjugative transfer pilus assembly protein TraB                                        |
| Cj9  | IncF plasmid conjugative transfer pilus assembly protein TraC                                        |
| Cj9  | IncF plasmid conjugative transfer pilus assembly protein TraE                                        |
| Cj9  | IncF plasmid conjugative transfer pilus assembly protein TraH                                        |
| Cj9  | IncF plasmid conjugative transfer pilus assembly protein TraK                                        |
| Cj9  | IncF plasmid conjugative transfer pilus assembly protein TraL                                        |
| Cj9  | IncF plasmid conjugative transfer pilus assembly protein TraU                                        |
| Cj9  | IncF plasmid conjugative transfer pilus assembly protein TraV                                        |
| Cj9  | IncF plasmid conjugative transfer pilus assembly protein TraW                                        |
| Cj9  | IncF plasmid conjugative transfer protein TraN                                                       |
| Cj9  | IncF plasmid conjugative transfer surface exclusion protein TraT                                     |
| Cj9  | M protein, putative                                                                                  |
| Cj9  | Phage recombination protein Bet                                                                      |
| Cj9  | Putative thioredoxin                                                                                 |
| Cj9  | Thiol:disulfide involved in conjugative transfer                                                     |
| Cj9  | Thymidine kinase (EC 27121)                                                                          |
| Cj10 | ATPase required for both assembly of type IV secretion complex and secretion of T-DNA complex, VirB4 |
| Cj10 | Domain of unknown function (DUF332) superfamily                                                      |
| Cj10 | Erythrocyte membrane-associated antigen                                                              |
| Cj10 | formyl transferase domain protein                                                                    |
| Cj10 | Gamma-glutamyltranspeptidase (EC 2322) @ Glutathione hydrolase (EC 341913)                           |
| Cj10 | Glycosyl transferase family 8 family                                                                 |
| Cj10 | Hypothetical protein pVir0004                                                                        |
| Cj10 | Hypothetical protein pVir0007                                                                        |



|      |                                                                                                |
|------|------------------------------------------------------------------------------------------------|
| Cj10 | Hypothetical protein pVir0008                                                                  |
| Cj10 | Hypothetical protein pVir0009                                                                  |
| Cj10 | Hypothetical protein pVir0012                                                                  |
| Cj10 | Hypothetical protein pVir0015                                                                  |
| Cj10 | Hypothetical protein pVir0019/pVir0020                                                         |
| Cj10 | Hypothetical protein pVir0029, glutamine-rich                                                  |
| Cj10 | Hypothetical protein pVir0042                                                                  |
| Cj10 | Hypothetical protein, Lmo2313 homolog [Bacteriophage A118]                                     |
| Cj10 | IncF plasmid conjugative transfer protein TraG                                                 |
| Cj10 | lipopolysaccharide core biosynthesis protein LpsA                                              |
| Cj10 | Mll5128 protein                                                                                |
| Cj10 | Plasmid partitioning protein ParA                                                              |
| Cj10 | probable integral membrane protein Cj0014c                                                     |
| Cj10 | Protein of unknown function DUF262 family                                                      |
| Cj10 | Putative MCP-type signal transduction protein                                                  |
| Cj10 | Putative resistance protein                                                                    |
| Cj10 | RepE replication protein, putative                                                             |
| Cj10 | Tgh102                                                                                         |
| Cj10 | thiol:disulfide interchange protein (dsbC), putative                                           |
| Cj11 | Adenine-specific methyltransferase (EC 21172)                                                  |
| Cj11 | Antirestriction protein                                                                        |
| Cj11 | Bores hole in peptidoglycan layer allowing type IV secretion complex assembly to occur (VirB1) |
| Cj11 | cell filamentation-like protein                                                                |
| Cj11 | Conjugative transfer protein TrbB                                                              |
| Cj11 | Conjugative transfer protein TrbD                                                              |
| Cj11 | Conjugative transfer protein TrbE                                                              |
| Cj11 | Conjugative transfer protein TrbF                                                              |
| Cj11 | Conjugative transfer protein TrbI                                                              |

|      |                                                        |
|------|--------------------------------------------------------|
| Cj11 | Conjugative transfer protein TrbL                      |
| Cj11 | DNA repair protein rad2, putative                      |
| Cj11 | DNA-binding protein Roi                                |
| Cj11 | emm-like protein                                       |
| Cj11 | Endonuclease I precursor (EC 31211)                    |
| Cj11 | FIG00470232: hypothetical protein                      |
| Cj11 | FIG00470236: hypothetical protein                      |
| Cj11 | FIG048677: hypothetical protein, phage tail fiber-like |
| Cj11 | HNH endonuclease domain protein                        |
| Cj11 | host-nuclease inhibitor protein Gam, putative          |
| Cj11 | Major capsid protein, HK97 family                      |
| Cj11 | Phage baseplate assembly protein GpJ                   |
| Cj11 | Phage baseplate assembly protein GpV                   |
| Cj11 | Phage baseplate assembly protein GpW                   |
| Cj11 | Phage DNA adenine methylase (EC 21172)                 |
| Cj11 | phage head-tail adaptor, putative                      |
| Cj11 | Phage head, major capsid protein E                     |
| Cj11 | Phage holin/antiholin component S                      |
| Cj11 | Phage integrase                                        |
| Cj11 | Phage major tail tube protein GpFII                    |
| Cj11 | Phage portal protein                                   |
| Cj11 | Phage protein Mup29, H                                 |
| Cj11 | Phage protein Mup32, I                                 |
| Cj11 | phage protein, HK97 gp10 family                        |
| Cj11 | phage repressor protein, putative                      |
| Cj11 | Phage tail fiber protein GpH                           |
| Cj11 | Phage tail formation protein GpD                       |
| Cj11 | Phage tail formation protein GpI                       |

|      |                                                                                          |
|------|------------------------------------------------------------------------------------------|
| Cj11 | Phage tail length tape-measure protein GpT                                               |
| Cj11 | Phage tail protein E                                                                     |
| Cj11 | Phage tail protein GpU                                                                   |
| Cj11 | Phage tail protein GpX                                                                   |
| Cj11 | Phage tail sheath monomer GpFI                                                           |
| Cj11 | Phage terminase, large subunit                                                           |
| Cj11 | Phage terminase, small subunit                                                           |
| Cj11 | phage uncharacterized protein                                                            |
| Cj11 | Phage virion morphogenesis protein Mup30, F                                              |
| Cj11 | phage virion morphogenesis protein, putative                                             |
| Cj11 | Putative DNA-binding protein                                                             |
| Cj11 | Replication initiation ATPase; bacteriophage DNA transposition B protein                 |
| Cj11 | RloG protein, putative                                                                   |
| Cj11 | toxin-antitoxin protein, putative                                                        |
| Cj11 | transfer origin protein, TraL                                                            |
| Cj12 | CAAX amino terminal protease family protein                                              |
| Cj12 | cytosine specific DNA methyltransferase (BSP6IM)                                         |
| Cj12 | DNA methylase                                                                            |
| Cj12 | FIG00469806: hypothetical protein                                                        |
| Cj12 | FIG00470049: hypothetical protein                                                        |
| Cj12 | FIG00470782: hypothetical protein                                                        |
| Cj12 | FIG00472372: hypothetical protein                                                        |
| Cj12 | Glycerol-3-phosphate transporter                                                         |
| Cj12 | GTP-binding protein                                                                      |
| Cj12 | LSU rRNA # 23S rRNA, large subunit ribosomal RNA - 3 prime truncation                    |
| Cj12 | Outer membrane protein ImpK/VasF, OmpA/MotB domain                                       |
| Cj12 | oxidoreductase                                                                           |
| Cj12 | Phosphoethanolamine transferase specific for the outer Kdo residue of lipopolysaccharide |

|      |                                                                             |
|------|-----------------------------------------------------------------------------|
| Cj12 | probable acetyltransferase Cj0295                                           |
| Cj12 | Protein ImpG/VasA                                                           |
| Cj12 | Putative membrane protein                                                   |
| Cj12 | Putative oxidoreductase                                                     |
| Cj12 | Putative transcriptional regulator                                          |
| Cj12 | Radical SAM domain protein                                                  |
| Cj12 | T6SS component Hcp                                                          |
| Cj12 | T6SS component TssB (ImpB/VipA)                                             |
| Cj12 | T6SS component TssC (ImpC/VipB)                                             |
| Cj12 | T6SS component TssK (ImpJ/VasE)                                             |
| Cj12 | Tgh089                                                                      |
| Cj12 | Tgh112                                                                      |
| Cj12 | transcriptional regulator, Cro/CI family                                    |
| Cj12 | Type I restriction-modification system, specificity subunit S (EC 3.1.21.3) |
| Cj12 | Type II restriction adenine-specific methylase (EC 2.1.1.72)                |
| Cj12 | Uncharacterized protein similar to VCA0109                                  |
| Cj12 | VgrG protein                                                                |
| Cj13 | Capsular polysaccharide biosynthesis protein                                |
| Cj13 | Cell wall-associated hydrolase                                              |
| Cj13 | D-alanyl-D-alanine carboxypeptidase (EC 3.4.16.4)                           |
| Cj13 | Death on curing protein, Doc toxin                                          |
| Cj13 | dna methylase-type I restriction-modification system                        |
| Cj13 | FIG00469675: hypothetical protein                                           |
| Cj13 | FIG00469749: hypothetical protein                                           |
| Cj13 | FIG00469921: hypothetical protein                                           |
| Cj13 | FIG00470126: hypothetical protein                                           |
| Cj13 | FIG00470444: hypothetical protein                                           |
| Cj13 | FIG00470625: hypothetical protein                                           |

|              |                                                                                                                                                                                 |
|--------------|---------------------------------------------------------------------------------------------------------------------------------------------------------------------------------|
| Cj13         | FIG00470651: hypothetical protein                                                                                                                                               |
| Cj13         | FIG00470885: hypothetical protein                                                                                                                                               |
| Cj13         | FIG00470993: hypothetical protein                                                                                                                                               |
| Cj13         | FIG00471428: hypothetical protein                                                                                                                                               |
| Cj13         | Hydrolase in polyol utilization gene cluster, haloacid dehalogenase-like family                                                                                                 |
| Cj13         | MGC82361 protein                                                                                                                                                                |
| Cj13         | Nucleoside-diphosphate-sugar pyrophosphorylase involved in lipopolysaccharide biosynthesis/translation initiation factor 2B, gamma/epsilon subunits (eIF-2Bgamma/eIF-2Bepsilon) |
| Cj13         | Phosphonate ABC transporter phosphate-binding periplasmic component (TC 3A191)                                                                                                  |
| Cj13         | Polysaccharide deacetylase family                                                                                                                                               |
| Cj13         | Predicted transcriptional regulator containing an HTH domain and an uncharacterized domain shared with the mammalian protein Schlafen                                           |
| Cj13         | Putative Dihydrolipoamide dehydrogenase (EC 1814); Mercuric ion reductase (EC 11611); PF00070 family, FAD-dependent NAD(P)-disulphide oxidoreductase                            |
| Cj13         | Putative phage protein                                                                                                                                                          |
| Cj13         | Tgh063                                                                                                                                                                          |
| Cj13         | Tgh141                                                                                                                                                                          |
| Cj13         | Type III restriction-modification system methylation subunit (EC 21172)                                                                                                         |
| Cj13         | Type III restriction-modification system restriction subunit (EC 31215)                                                                                                         |
| Cj13         | very hypothetical protein Cj0974                                                                                                                                                |
| Unclassified | Adenine-specific DNA methyltransferase                                                                                                                                          |
| Unclassified | Alcohol dehydrogenase (EC 1.1.1.1)                                                                                                                                              |
| Unclassified | alpha-2,3-sialyltransferase                                                                                                                                                     |
| Unclassified | Anticodon nuclease                                                                                                                                                              |
| Unclassified | Bacillosamine/Legionaminic acid biosynthesis aminotransferase PglE; 4-keto-6-deoxy-N-Acetyl-D-hexosaminy-(Lipid carrier) aminotransferase                                       |
| Unclassified | bacteriophage DNA transposition protein A, putative                                                                                                                             |
| Unclassified | Beta-galactosidase (EC 3.2.1.23)                                                                                                                                                |
| Unclassified | CDP-glycerol:poly(glycerophosphate) glycerophosphotransferase (EC 2.7.8.12)                                                                                                     |
| Unclassified | Chitinase (EC 3.2.1.14)                                                                                                                                                         |
| Unclassified | CpsC                                                                                                                                                                            |

|              |                                                                                                                                                      |
|--------------|------------------------------------------------------------------------------------------------------------------------------------------------------|
| Unclassified | CRISPR-associated RecB family exonuclease Cas4                                                                                                       |
| Unclassified | Cytidylyltransferase domain / Phosphoenolpyruvate phosphomutase (EC 5.4.2.9)                                                                         |
| Unclassified | Dihydropyrimidine dehydrogenase [NADP+] (EC 1.3.1.2) / Pyridine nucleotide-disulphide oxidoreductase associated with reductive pyrimidine catabolism |
| Unclassified | DNA binding domain, excisionase family                                                                                                               |
| Unclassified | DNA transposition protein                                                                                                                            |
| Unclassified | DNA-cytosine methyltransferase (EC 2.1.1.37)                                                                                                         |
| Unclassified | Fic domain protein, MA2133 type                                                                                                                      |
| Unclassified | Fic family protein MloA                                                                                                                              |
| Unclassified | FIG00469547: hypothetical protein                                                                                                                    |
| Unclassified | FIG00469626: hypothetical protein                                                                                                                    |
| Unclassified | FIG00469776: hypothetical protein                                                                                                                    |
| Unclassified | FIG00469983: hypothetical protein                                                                                                                    |
| Unclassified | FIG00470037: hypothetical protein                                                                                                                    |
| Unclassified | FIG00470129: hypothetical protein                                                                                                                    |
| Unclassified | FIG00470265: hypothetical protein                                                                                                                    |
| Unclassified | FIG00470419: hypothetical protein                                                                                                                    |
| Unclassified | FIG00470447: hypothetical protein                                                                                                                    |
| Unclassified | FIG00471393: hypothetical protein                                                                                                                    |
| Unclassified | FIG00471437: hypothetical protein                                                                                                                    |
| Unclassified | FIG00471554: hypothetical protein                                                                                                                    |
| Unclassified | FIG00471635: hypothetical protein                                                                                                                    |
| Unclassified | FIG00471674: hypothetical protein                                                                                                                    |
| Unclassified | FIG00471942: hypothetical protein                                                                                                                    |
| Unclassified | FIG00711288: hypothetical protein                                                                                                                    |
| Unclassified | FIG01210424: hypothetical protein                                                                                                                    |
| Unclassified | Formyl transferase domain protein                                                                                                                    |
| Unclassified | Glycerate kinase (EC 2.7.1.31)                                                                                                                       |

|              |                                                                                                                                                                                                                                                                                                                                                                   |
|--------------|-------------------------------------------------------------------------------------------------------------------------------------------------------------------------------------------------------------------------------------------------------------------------------------------------------------------------------------------------------------------|
| Unclassified | Glycerol-3-phosphate cytidyltransferase (EC 2.7.7.39)                                                                                                                                                                                                                                                                                                             |
| Unclassified | Glycosyl transferase, family 2                                                                                                                                                                                                                                                                                                                                    |
| Unclassified | Group-specific protein                                                                                                                                                                                                                                                                                                                                            |
| Unclassified | Hypothetical protein Cj0566                                                                                                                                                                                                                                                                                                                                       |
| Unclassified | Hypothetical protein Cj0569                                                                                                                                                                                                                                                                                                                                       |
| Unclassified | Hypothetical protein pVir0016                                                                                                                                                                                                                                                                                                                                     |
| Unclassified | IncF plasmid conjugative transfer protein TraD                                                                                                                                                                                                                                                                                                                    |
| Unclassified | Indolepyruvate ferredoxin oxidoreductase, alpha and beta subunits                                                                                                                                                                                                                                                                                                 |
| Unclassified | Inner membrane protein YihY, formerly thought to be RNase BN                                                                                                                                                                                                                                                                                                      |
| Unclassified | LSU rRNA # 23S rRNA, large subunit ribosomal RNA - 5 prime truncation                                                                                                                                                                                                                                                                                             |
| Unclassified | LSU rRNA # 23S rRNA, large subunit ribosomal RNA - 5 prime truncation - 3 prime truncation                                                                                                                                                                                                                                                                        |
| Unclassified | MCP-domain signal transduction protein                                                                                                                                                                                                                                                                                                                            |
| Unclassified | mRNA interferase YafQ                                                                                                                                                                                                                                                                                                                                             |
| Unclassified | N-Acetyltransferase PseH involved in the biosynthesis of pseudaminic acid                                                                                                                                                                                                                                                                                         |
| Unclassified | Nucleoside-diphosphate-sugar pyrophosphorylase involved in lipopolysaccharide biosynthesis/translation initiation factor 2B, gamma/epsilon subunits (eIF-2Bgamma/eIF-2Bepsilon) / Nucleoside-diphosphate-sugar pyrophosphorylase involved in lipopolysaccharide biosynthesis/translation initiation factor 2B, gamma/epsilon subunits (eIF-2Bgamma/eIF-2Bepsilon) |
| Unclassified | Nucleotide sugar dehydratase, putative                                                                                                                                                                                                                                                                                                                            |
| Unclassified | Pentapeptide repeat family protein                                                                                                                                                                                                                                                                                                                                |
| Unclassified | Phage antirepressor protein                                                                                                                                                                                                                                                                                                                                       |
| Unclassified | Phage major capsid protein                                                                                                                                                                                                                                                                                                                                        |
| Unclassified | phage major tail tube protein, putative                                                                                                                                                                                                                                                                                                                           |
| Unclassified | Phage protein                                                                                                                                                                                                                                                                                                                                                     |
| Unclassified | phage putative head morphogenesis protein, SPP1 gp7 family                                                                                                                                                                                                                                                                                                        |
| Unclassified | Phage tail formation protein D                                                                                                                                                                                                                                                                                                                                    |
| Unclassified | Phage tail length tape-measure protein T                                                                                                                                                                                                                                                                                                                          |
| Unclassified | Phosphate transport system permease protein PstA (TC 3.A.1.7.1)                                                                                                                                                                                                                                                                                                   |
| Unclassified | Phosphomevalonate kinase (EC 2.7.4.2)                                                                                                                                                                                                                                                                                                                             |
| Unclassified | Phosphonopyruvate decarboxylase (EC 4.1.1.82)                                                                                                                                                                                                                                                                                                                     |

|              |                                                                     |
|--------------|---------------------------------------------------------------------|
| Unclassified | Possible lipoprotein                                                |
| Unclassified | Possible outer membrane protein                                     |
| Unclassified | predicted secreted protein                                          |
| Unclassified | prophage ps3 protein 01                                             |
| Unclassified | putative antirepressor                                              |
| Unclassified | putative DNA helicase                                               |
| Unclassified | putative serine/threonine protein kinase                            |
| Unclassified | putative TYPE II DNA MODIFICATION ENZYME (METHYLTRANSFERASE)        |
| Unclassified | Putrescine transport ATP-binding protein PotA (TC 3.A.1.11.1)       |
| Unclassified | Replicative DNA helicase (EC 3.6.1.-)                               |
| Unclassified | RloF                                                                |
| Unclassified | Serine/threonine protein kinase PrkC, regulator of stationary phase |
| Unclassified | Sugar phosphate permease of the Major Facilitator Superfamily       |
| Unclassified | terminase B protein, putative                                       |
| Unclassified | Tol-Pal system-associated acyl-CoA thioesterase                     |
| Unclassified | tRNA-Pseudo-TCT                                                     |
| Unclassified | Uncharacterized protein ImpA                                        |



**Supplemental Table 5.** Protein encoding genes belonging to *Campylobacter coli* (n=13 isolates) variable genomes.

| <b>Cluster</b> | <b>Protein-encoding gene</b>                                                  |
|----------------|-------------------------------------------------------------------------------|
| Cc1            | 3-oxoacyl-[acyl-carrier protein] reductase (EC 1.1.1.100)                     |
| Cc1            | C4-dicarboxylate anaerobic carrier, putative                                  |
| Cc1            | Capsular polysaccharide biosynthesis heptosyltransferase HddD                 |
| Cc1            | CDP-4-dehydro-6-deoxy-D-glucose 3-dehydratase (EC 4.2.1.-)                    |
| Cc1            | CDP-abequose synthase                                                         |
| Cc1            | conserved hypothetical protein TIGR01671                                      |
| Cc1            | D-glycero-alpha-D-manno-heptose 1-phosphate guanylyltransferase (EC 2.7.7.71) |
| Cc1            | D-glycero-alpha-D-manno-heptose 7-phosphate kinase (EC 2.7.1.168)             |
| Cc1            | dTDP-4-dehydrorhamnose 3,5-epimerase (EC 5.1.3.13)                            |
| Cc1            | Endonuclease I precursor (EC 3.1.21.1)                                        |
| Cc1            | Enterochelin uptake permease CeuB                                             |
| Cc1            | FIG00469658: hypothetical protein                                             |
| Cc1            | FIG00469879: hypothetical protein                                             |
| Cc1            | GDP-L-fucose synthetase (EC 1.1.1.271)                                        |
| Cc1            | GDP-mannose 4,6-dehydratase (EC 4.2.1.47)                                     |
| Cc1            | Glucose-1-phosphate cytidyltransferase (EC 2.7.7.33)                          |
| Cc1            | Glycerate kinase (EC 2.7.1.31)                                                |
| Cc1            | host-nuclease inhibitor protein Gam, putative                                 |
| Cc1            | membrane protein , putative                                                   |
| Cc1            | membrane protein, putative                                                    |
| Cc1            | methyl-accepting chemotaxis protein, putative                                 |
| Cc1            | oligopeptide transporter                                                      |
| Cc1            | oxidoreductase of aldo/keto reductase family, subgroup 1                      |
| Cc1            | Phage baseplate assembly protein GpJ                                          |
| Cc1            | Phage baseplate assembly protein GpV                                          |

|     |                                                                                                       |
|-----|-------------------------------------------------------------------------------------------------------|
| Cc1 | Phage baseplate assembly protein GpW                                                                  |
| Cc1 | Phage DNA adenine methylase (EC 2.1.1.72)                                                             |
| Cc1 | Phage head, major capsid protein E                                                                    |
| Cc1 | Phage holin/antiholin component S                                                                     |
| Cc1 | Phage major tail tube protein GpFII                                                                   |
| Cc1 | Phage protein Mup29, H                                                                                |
| Cc1 | Phage protein Mup32, I                                                                                |
| Cc1 | phage repressor protein, putative                                                                     |
| Cc1 | Phage tail fiber protein GpH                                                                          |
| Cc1 | Phage tail formation protein GpD                                                                      |
| Cc1 | Phage tail formation protein GpI                                                                      |
| Cc1 | Phage tail length tape-measure protein GpT                                                            |
| Cc1 | Phage tail protein E                                                                                  |
| Cc1 | Phage tail protein GpU                                                                                |
| Cc1 | Phage tail protein GpX                                                                                |
| Cc1 | Phage tail sheath monomer GpFI                                                                        |
| Cc1 | phage uncharacterized protein                                                                         |
| Cc1 | Phage virion morphogenesis protein Mup30, F                                                           |
| Cc1 | phage virion morphogenesis protein, putative                                                          |
| Cc1 | Putative DNA-binding protein                                                                          |
| Cc1 | Replication initiation ATPase; bacteriophage DNA transposition B protein                              |
| Cc1 | Sugar phosphate permease of the Major Facilitator Superfamily                                         |
| Cc1 | UDP-glucose 6-dehydrogenase (EC 1.1.1.22)                                                             |
| Cc1 | UDP-glucuronate decarboxylase (EC 4.1.1.35)                                                           |
| Cc2 | 2-dehydro-3-deoxyglucarate aldolase (EC 4.1.2.20)                                                     |
| Cc2 | 3-oxoacyl-[acyl-carrier-protein] synthase, KASIII (EC 2.3.1.41)                                       |
| Cc2 | ATPase required for both assembly of type IV secretion complex and secretion of T-DNA complex, VirB11 |
| Cc2 | cag pathogenicity island protein (cag12)                                                              |

|     |                                                                                                |
|-----|------------------------------------------------------------------------------------------------|
| Cc2 | capsular polysaccharide biosynthesis protein, putative                                         |
| Cc2 | conserved hypothetical protein 22                                                              |
| Cc2 | Coupling protein VirD4, ATPase required for T-DNA transfer                                     |
| Cc2 | Cytidine diphosphoramidate kinase Cj1415                                                       |
| Cc2 | Cytolethal distending toxin subunit C                                                          |
| Cc2 | DNA primase (EC 2.7.7.-)                                                                       |
| Cc2 | DNA primase TraC, putative                                                                     |
| Cc2 | DNA topoisomerase III, TraE-type (EC 5.99.1.2)                                                 |
| Cc2 | dTDP-3-amino-3,6-dideoxy-alpha-D-galactopyranose 3-N-acetyltransferase (EC 2.3.1.197)          |
| Cc2 | dTDP-glucose 4,6-dehydratase (EC 4.2.1.46)                                                     |
| Cc2 | Fic family protein MloA                                                                        |
| Cc2 | FIG00469638: hypothetical protein                                                              |
| Cc2 | FIG00469761: hypothetical protein                                                              |
| Cc2 | FIG00470572: hypothetical protein                                                              |
| Cc2 | FIG00471048: hypothetical protein                                                              |
| Cc2 | FIG00471065: hypothetical protein                                                              |
| Cc2 | FIG00471323: hypothetical protein                                                              |
| Cc2 | FIG00471788: hypothetical protein                                                              |
| Cc2 | formyl transferase domain protein                                                              |
| Cc2 | Galactoside O-acetyltransferase( EC:2.3.1.79 )                                                 |
| Cc2 | gamma-Glutamyl-CDP-amidate hydrolase involved in O-methyl phosphoramidate capsule modification |
| Cc2 | Glucose-1-phosphate thymidyltransferase (EC 2.7.7.24)                                          |
| Cc2 | Glycosyl transferase, group 2 family protein                                                   |
| Cc2 | helicase, Snf2 family                                                                          |
| Cc2 | hydrolase, haloacid dehalogenase-like family                                                   |
| Cc2 | IncQ plasmid conjugative transfer DNA nicking endonuclease TraR (pTi VirD2 homolog)            |
| Cc2 | IncQ plasmid conjugative transfer protein TraG                                                 |
| Cc2 | IncQ plasmid conjugative transfer protein TraQ (RP4 TrbM homolog)                              |

|     |                                                                                                                                                                                                                                                                                                                                                                   |
|-----|-------------------------------------------------------------------------------------------------------------------------------------------------------------------------------------------------------------------------------------------------------------------------------------------------------------------------------------------------------------------|
| Cc2 | Inner membrane protein forms channel for type IV secretion of T-DNA complex, VirB3 / ATPase required for both assembly of type IV secretion complex and secretion of T-DNA complex, VirB4                                                                                                                                                                         |
| Cc2 | Inner membrane protein forms channel for type IV secretion of T-DNA complex, VirB8                                                                                                                                                                                                                                                                                |
| Cc2 | Inner membrane protein of type IV secretion of T-DNA complex, TonB-like, VirB10                                                                                                                                                                                                                                                                                   |
| Cc2 | Inner membrane protein of type IV secretion of T-DNA complex, VirB6                                                                                                                                                                                                                                                                                               |
| Cc2 | Iron compound ABC uptake transporter permease protein                                                                                                                                                                                                                                                                                                             |
| Cc2 | L-glutamine kinase involved in O-methyl phosphoramidate capsule modification                                                                                                                                                                                                                                                                                      |
| Cc2 | Lipoprotein of type IV secretion complex that spans outer membrane and periplasm, VirB7                                                                                                                                                                                                                                                                           |
| Cc2 | Major pilus subunit of type IV secretion complex, VirB2                                                                                                                                                                                                                                                                                                           |
| Cc2 | Methyltransferase (EC 2.1.1.-), possibly involved in O-methyl phosphoramidate capsule modification                                                                                                                                                                                                                                                                |
| Cc2 | Minor pilin of type IV secretion complex, VirB5                                                                                                                                                                                                                                                                                                                   |
| Cc2 | NAD-dependent epimerase/dehydratase                                                                                                                                                                                                                                                                                                                               |
| Cc2 | Nucleoside-diphosphate-sugar pyrophosphorylase involved in lipopolysaccharide biosynthesis/translation initiation factor 2B, gamma/epsilon subunits (eIF-2Bgamma/eIF-2Bepsilon) / Nucleoside-diphosphate-sugar pyrophosphorylase involved in lipopolysaccharide biosynthesis/translation initiation factor 2B, gamma/epsilon subunits (eIF-2Bgamma/eIF-2Bepsilon) |
| Cc2 | Outer membrane and periplasm component of type IV secretion of T-DNA complex, has secretin-like domain, VirB9                                                                                                                                                                                                                                                     |
| Cc2 | Phage Rha protein                                                                                                                                                                                                                                                                                                                                                 |
| Cc2 | Phosphoglutamine cytidyltransferase (EC 2.7.7.-) in O-methyl phosphoramidate capsule modification                                                                                                                                                                                                                                                                 |
| Cc2 | Possible sugar transferase                                                                                                                                                                                                                                                                                                                                        |
| Cc2 | Replication protein                                                                                                                                                                                                                                                                                                                                               |
| Cc2 | short chain dehydrogenase                                                                                                                                                                                                                                                                                                                                         |
| Cc2 | Site-specific recombinase, resolvase family                                                                                                                                                                                                                                                                                                                       |
| Cc2 | Type I restriction-modification system, restriction subunit R (EC 3.1.21.3)                                                                                                                                                                                                                                                                                       |
| Cc2 | Type I restriction-modification system, specificity subunit S                                                                                                                                                                                                                                                                                                     |

**Supplemental Table 6.** Antimicrobial resistance gene (ARG) profiles.

| <b>ARG profile</b>                                  | <b>Total number of isolates with the ARG profile</b> | <b><i>C. coli</i> isolates with the ARG profile</b> | <b><i>C. jejuni</i> isolates with the ARG profile</b> |
|-----------------------------------------------------|------------------------------------------------------|-----------------------------------------------------|-------------------------------------------------------|
| <i>50S_L22_A103V / blaOXA-603</i>                   | 3                                                    | 0                                                   | 3                                                     |
| <i>50S_L22_A103V / gyrA_T86I / tetO</i>             | 1                                                    | 0                                                   | 1                                                     |
| <i>aadE-Cc / blaOXA-193</i>                         | 7                                                    | 7                                                   | 0                                                     |
| <i>aph(3')-IIIa / blaOXA-193 / gyrA_T86I / tetO</i> | 2                                                    | 0                                                   | 2                                                     |
| <i>aph(3')-IIIa / blaOXA-193 / tetO</i>             | 8                                                    | 0                                                   | 8                                                     |
| <i>aph(3')-IIIa / tetO</i>                          | 1                                                    | 0                                                   | 1                                                     |
| <i>blaOXA-61</i>                                    | 1                                                    | 0                                                   | 1                                                     |
| <i>blaOXA-193</i>                                   | 15                                                   | 1                                                   | 14                                                    |
| <i>blaOXA-193 / gyrA_T86I / tetO</i>                | 5                                                    | 5                                                   | 0                                                     |
| <i>blaOXA-193 / tetO</i>                            | 8                                                    | 0                                                   | 8                                                     |
| <i>blaOXA-449 / tetO</i>                            | 3                                                    | 0                                                   | 3                                                     |
| <i>blaOXA-461 / tetO</i>                            | 5                                                    | 0                                                   | 5                                                     |
| <i>rpsL_K88R</i>                                    | 1                                                    | 0                                                   | 1                                                     |
| <i>tetO</i>                                         | 5                                                    | 0                                                   | 5                                                     |

**Supplemental Table 7.** Antimicrobial resistance gene (ARG) profiles per sequence type (ST) and clonal complex (CC).

| Species          | CC  | ST                                                    | ARG profile                                                              | Number of isolates |
|------------------|-----|-------------------------------------------------------|--------------------------------------------------------------------------|--------------------|
| <i>C. coli</i>   | 828 | 829                                                   | <i>aadE-Cc</i> / <i>blaOXA-193</i>                                       | 7                  |
|                  | 828 | 829                                                   | <i>blaOXA-193</i>                                                        | 1                  |
|                  | 828 | 1068                                                  | <i>blaOXA-193</i> / <i>gyrA_T86I</i> / <i>tetO</i>                       | 5                  |
| <i>C. jejuni</i> | 21  | 8                                                     | <i>blaOXA-193</i> / <i>tetO</i>                                          | 5                  |
|                  | 21  | 21                                                    | <i>tetO</i>                                                              | 1                  |
|                  | 21  | 21                                                    | <i>aph(3')-IIIa</i> / <i>blaOXA-193</i> / <i>gyrA_T86I</i> / <i>tetO</i> | 1                  |
|                  | 21  | 806                                                   | <i>aph(3')-IIIa</i> / <i>blaOXA-193</i> / <i>gyrA_T86I</i> / <i>tetO</i> | 1                  |
|                  | 21  | 806                                                   | <i>aph(3')-IIIa</i> / <i>blaOXA-193</i> / <i>tetO</i>                    | 3                  |
|                  | 21  | 922                                                   | <i>aph(3')-IIIa</i> / <i>blaOXA-193</i> / <i>tetO</i>                    | 5                  |
|                  | 21  | 922                                                   | <i>blaOXA-193</i>                                                        | 5                  |
|                  | 21  | 929                                                   | <i>blaOXA-461</i> / <i>tetO</i>                                          | 3                  |
|                  | 21  | 982                                                   | <i>blaOXA-193</i> / <i>tetO</i>                                          | 2                  |
|                  | 42  | 42                                                    | None                                                                     | 2                  |
|                  | 42  | 459                                                   | <i>aph(3')-IIIa</i> / <i>tetO</i>                                        | 1                  |
|                  | 42  | 459                                                   | <i>tetO</i>                                                              | 3                  |
|                  | 42  | 604                                                   | <i>rpsL_K88R</i>                                                         | 1                  |
|                  | 42  | 11712                                                 | <i>tetO</i>                                                              | 1                  |
|                  | 42  | 11771                                                 | <i>tetO</i>                                                              | 1                  |
|                  | 45  | 45                                                    | <i>blaOXA-449</i> / <i>tetO</i>                                          | 3                  |
|                  | 48  | 48                                                    | <i>blaOXA-61</i>                                                         | 1                  |
|                  | 52  | 52                                                    | <i>50S_L22_A103V</i> / <i>blaOXA-603</i>                                 | 3                  |
|                  | 61  | 61                                                    | <i>blaOXA-193</i>                                                        | 7                  |
|                  | 61  | 1244                                                  | <i>blaOXA-193</i> / <i>tetO</i>                                          | 1                  |
|                  | 257 | 5261                                                  | <i>blaOXA-461</i> / <i>tetO</i>                                          | 2                  |
|                  | 283 | 267                                                   | <i>blaOXA-193</i>                                                        | 1                  |
|                  | 403 | 403                                                   | None                                                                     | 2                  |
| 464              | 464 | <i>50S_L22_A103V</i> / <i>gyrA_T86I</i> / <i>tetO</i> | 1                                                                        |                    |

**Supplemental Table 8.** Co-occurrence profile of *Campylobacter coli* variable genomes (n=13 isolates)

| Cluster                                                   | Protein-encoding gene                                                                                                                                                                     |
|-----------------------------------------------------------|-------------------------------------------------------------------------------------------------------------------------------------------------------------------------------------------|
| Conjugation /<br>type 4<br>secretion<br>system<br>cluster | outer membrane and periplasm component of type IV secretion of T-DNA complex, has secretin-like domain, VirB9                                                                             |
|                                                           | Tetracycline resistance, ribosomal protection type => Tet(O)                                                                                                                              |
|                                                           | capsular polysaccharide biosynthesis protein, putative                                                                                                                                    |
|                                                           | gamma-Glutamyl-CDP-amidate hydrolase involved in O-methyl phosphoramidate capsule modification                                                                                            |
|                                                           | L-glutamine kinase involved in O-methyl phosphoramidate capsule modification                                                                                                              |
|                                                           | Methyltransferase (EC 2.1.1.-), possibly involved in O-methyl phosphoramidate capsule modification                                                                                        |
|                                                           | Phosphoglutamine cytidyltransferase (EC 2.7.7.-) in O-methyl phosphoramidate capsule modification                                                                                         |
|                                                           | ATPase required for both assembly of type IV secretion complex and secretion of T-DNA complex, VirB11                                                                                     |
|                                                           | Coupling protein VirD4, ATPase required for T-DNA transfer                                                                                                                                |
|                                                           | DNA primase (EC 2.7.7.-)                                                                                                                                                                  |
|                                                           | DNA primase TraC, putative                                                                                                                                                                |
|                                                           | DNA topoisomerase III, TraE-type (EC 5.99.1.2)                                                                                                                                            |
|                                                           | IncQ plasmid conjugative transfer DNA nicking endonuclease TraR (pTi VirD2 homolog)                                                                                                       |
|                                                           | IncQ plasmid conjugative transfer protein TraG                                                                                                                                            |
|                                                           | IncQ plasmid conjugative transfer protein TraQ (RP4 TrbM homolog)                                                                                                                         |
|                                                           | Inner membrane protein forms channel for type IV secretion of T-DNA complex, VirB3 / ATPase required for both assembly of type IV secretion complex and secretion of T-DNA complex, VirB4 |
|                                                           | Inner membrane protein forms channel for type IV secretion of T-DNA complex, VirB8                                                                                                        |
|                                                           | Inner membrane protein of type IV secretion of T-DNA complex, TonB-like, VirB10                                                                                                           |
|                                                           | Inner membrane protein of type IV secretion of T-DNA complex, VirB6                                                                                                                       |
|                                                           | Lipoprotein of type IV secretion complex that spans outer membrane and periplasm, VirB7                                                                                                   |
|                                                           | Major pilus subunit of type IV secretion complex, VirB2                                                                                                                                   |
|                                                           | Minor pilin of type IV secretion complex, VirB5                                                                                                                                           |
|                                                           | Outer membrane and periplasm component of type IV secretion of T-DNA complex, has secretin-like domain, VirB9                                                                             |
|                                                           | Phage Rha protein                                                                                                                                                                         |
|                                                           | cag pathogenicity island protein (cag12)                                                                                                                                                  |
| Cytidine diphosphoramidate kinase Cj1415                  |                                                                                                                                                                                           |

|                  |                                                                                                                                                                                                                                                                                                                                                                   |
|------------------|-------------------------------------------------------------------------------------------------------------------------------------------------------------------------------------------------------------------------------------------------------------------------------------------------------------------------------------------------------------------|
|                  | Type I restriction-modification system, restriction subunit R (EC 3.1.21.3)                                                                                                                                                                                                                                                                                       |
|                  | 3-oxoacyl-[acyl-carrier-protein] synthase, KASIII (EC 2.3.1.41)                                                                                                                                                                                                                                                                                                   |
|                  | Fic family protein MloA                                                                                                                                                                                                                                                                                                                                           |
|                  | Glucose-1-phosphate thymidyltransferase (EC 2.7.7.24)                                                                                                                                                                                                                                                                                                             |
|                  | dTDP-glucose 4,6-dehydratase (EC 4.2.1.46)                                                                                                                                                                                                                                                                                                                        |
|                  | 2-dehydro-3-deoxyglucarate aldolase (EC 4.1.2.20)                                                                                                                                                                                                                                                                                                                 |
|                  | Cytolethal distending toxin subunit C                                                                                                                                                                                                                                                                                                                             |
|                  | dTDP-3-amino-3,6-dideoxy-alpha-D-galactopyranose 3-N-acetyltransferase (EC 2.3.1.197)                                                                                                                                                                                                                                                                             |
|                  | formyl transferase domain protein                                                                                                                                                                                                                                                                                                                                 |
|                  | Galactoside O-acetyltransferase( EC:2.3.1.79 )                                                                                                                                                                                                                                                                                                                    |
|                  | Glycosyl transferase, group 2 family protein                                                                                                                                                                                                                                                                                                                      |
|                  | helicase, Snf2 family                                                                                                                                                                                                                                                                                                                                             |
|                  | hydrolase, haloacid dehalogenase-like family                                                                                                                                                                                                                                                                                                                      |
|                  | Iron compound ABC uptake transporter permease protein                                                                                                                                                                                                                                                                                                             |
|                  | NAD-dependent epimerase/dehydratase                                                                                                                                                                                                                                                                                                                               |
|                  | Nucleoside-diphosphate-sugar pyrophosphorylase involved in lipopolysaccharide biosynthesis/translation initiation factor 2B, gamma/epsilon subunits (eIF-2Bgamma/eIF-2Bepsilon) / Nucleoside-diphosphate-sugar pyrophosphorylase involved in lipopolysaccharide biosynthesis/translation initiation factor 2B, gamma/epsilon subunits (eIF-2Bgamma/eIF-2Bepsilon) |
|                  | Possible sugar transferase                                                                                                                                                                                                                                                                                                                                        |
|                  | Replication protein                                                                                                                                                                                                                                                                                                                                               |
|                  | short chain dehydrogenase                                                                                                                                                                                                                                                                                                                                         |
|                  | Site-specific recombinase, resolvase family                                                                                                                                                                                                                                                                                                                       |
|                  | Type I restriction-modification system, specificity subunit S                                                                                                                                                                                                                                                                                                     |
| Prophage cluster | Enterochelin uptake permease CeuB                                                                                                                                                                                                                                                                                                                                 |
|                  | 3-oxoacyl-[acyl-carrier protein] reductase (EC 1.1.1.100)                                                                                                                                                                                                                                                                                                         |
|                  | GDP-L-fucose synthetase (EC 1.1.1.271)                                                                                                                                                                                                                                                                                                                            |
|                  | host-nuclease inhibitor protein Gam, putative                                                                                                                                                                                                                                                                                                                     |
|                  | Glycerate kinase (EC 2.7.1.31)                                                                                                                                                                                                                                                                                                                                    |
|                  | GDP-mannose 4,6-dehydratase (EC 4.2.1.47)                                                                                                                                                                                                                                                                                                                         |
|                  | dTDP-4-dehydrorhamnose 3,5-epimerase (EC 5.1.3.13)                                                                                                                                                                                                                                                                                                                |



|                                                                               |
|-------------------------------------------------------------------------------|
| Glucose-1-phosphate cytidylyltransferase (EC 2.7.7.33)                        |
| UDP-glucose 6-dehydrogenase (EC 1.1.1.22)                                     |
| C4-dicarboxylate anaerobic carrier, putative                                  |
| CDP-4-dehydro-6-deoxy-D-glucose 3-dehydratase (EC 4.2.1.-)                    |
| CDP-abequose synthase                                                         |
| conserved hypothetical protein TIGR01671                                      |
| Endonuclease I precursor (EC 3.1.21.1)                                        |
| membrane protein , putative                                                   |
| membrane protein, putative                                                    |
| methyl-accepting chemotaxis protein, putative                                 |
| oligopeptide transporter                                                      |
| oxidoreductase of aldo/keto reductase family, subgroup 1                      |
| Sugar phosphate permease of the Major Facilitator Superfamily                 |
| UDP-glucuronate decarboxylase (EC 4.1.1.35)                                   |
| Putative DNA-binding protein                                                  |
| D-glycero-alpha-D-manno-heptose 7-phosphate kinase (EC 2.7.1.168)             |
| D-glycero-alpha-D-manno-heptose 1-phosphate guanylyltransferase (EC 2.7.7.71) |
| Capsular polysaccharide biosynthesis heptosyltransferase HddD                 |
| Phage baseplate assembly protein GpJ                                          |
| Phage baseplate assembly protein GpV                                          |
| Phage baseplate assembly protein GpW                                          |
| Phage DNA adenine methylase (EC 2.1.1.72)                                     |
| Phage head, major capsid protein E                                            |
| Phage holin/antiholin component S                                             |
| Phage major tail tube protein GpFII                                           |
| Phage protein Mup29, H                                                        |
| Phage protein Mup32, I                                                        |
| phage repressor protein, putative                                             |
| Phage tail fiber protein GpH                                                  |
| Phage tail formation protein GpD                                              |

|                                    |                                                                          |
|------------------------------------|--------------------------------------------------------------------------|
|                                    | Phage tail formation protein GpI                                         |
|                                    | Phage tail length tape-measure protein GpT                               |
|                                    | Phage tail protein E                                                     |
|                                    | Phage tail protein GpU                                                   |
|                                    | Phage tail protein GpX                                                   |
|                                    | Phage tail sheath monomer GpFI                                           |
|                                    | phage uncharacterized protein                                            |
|                                    | Phage virion morphogenesis protein Mup30, F                              |
|                                    | phage virion morphogenesis protein, putative                             |
|                                    | Replication initiation ATPase; bacteriophage DNA transposition B protein |
| Arsenical<br>resistance<br>cluster | aminoglycoside 6-adenylyltransferase                                     |
|                                    | Arsenate reductase (EC 1.20.4.4) thioredoxin-coupled, LMWP family        |
|                                    | Arsenical resistance operon repressor                                    |
|                                    | Arsenical-resistance protein ACR3                                        |
|                                    | Dienelactone hydrolase and related enzymes                               |
|                                    | RecD-like DNA helicase YrrC                                              |
|                                    | Uncharacterized membrane protein, YraQ family                            |
|                                    | Uncharacterized NAD(P)H oxidoreductase, YdeQ/YrkL/YwrO family            |

**Supplemental Table 9.** Antibiotic resistance genes located on plasmids identified by MOB-Suite.

| species   | NCBI_id | contig_id         | p_cluster | p_neighbor | ARG_gene            | ARG_class      |
|-----------|---------|-------------------|-----------|------------|---------------------|----------------|
| <i>Cj</i> | 113002  | Contig_30_81.5577 | AC321     | CP045046   | <i>tet(O)</i>       | tetracycline   |
| <i>Cj</i> | 113002  | Contig_30_81.5577 | AC321     | CP045046   | <i>aph(3')-IIIa</i> | aminoglycoside |
| <i>Cc</i> | 112154  | Contig_18_281.007 | AC320     | CP017418   | <i>tet(O)</i>       | tetracycline   |
| <i>Cc</i> | 112156  | Contig_12_290.262 | AC320     | CP017418   | <i>tet(O)</i>       | tetracycline   |
| <i>Cj</i> | 112944  | Contig_2_155.04   | AC320     | AY394561   | <i>tet(O)</i>       | tetracycline   |
| <i>Cc</i> | 112141  | Contig_16_86.1009 | AC320     | CP017418   | <i>tet(O)</i>       | tetracycline   |
| <i>Cc</i> | 112142  | Contig_27_122.643 | AC320     | CP017418   | <i>tet(O)</i>       | tetracycline   |
| <i>Cj</i> | 112992  | Contig_34_165.248 | AC320     | KJ646012   | <i>tet(O)</i>       | tetracycline   |
| <i>Cj</i> | 112992  | Contig_38_168.852 | AC320     | KJ646012   | <i>aph(3')-IIIa</i> | aminoglycoside |
| <i>Cj</i> | 112936  | Contig_11_151.827 | AC320     | CP013035   | <i>tet(O)</i>       | tetracycline   |
| <i>Cj</i> | 112936  | Contig_11_151.827 | AC320     | CP013035   | <i>aph(3')-IIIa</i> | aminoglycoside |
| <i>Cj</i> | 112949  | Contig_13_136.708 | AC321     | CP045046   | <i>tet(O)</i>       | tetracycline   |
| <i>Cj</i> | 112949  | Contig_13_136.708 | AC321     | CP045046   | <i>aph(3')-IIIa</i> | aminoglycoside |
| <i>Cj</i> | 113016  | Contig_33_191.185 | AC320     | KJ646012   | <i>tet(O)</i>       | tetracycline   |
| <i>Cj</i> | 113016  | Contig_33_191.185 | AC320     | KJ646012   | <i>aph(3')-IIIa</i> | aminoglycoside |
| <i>Cj</i> | 112958  | Contig_8_186.212  | AC320     | CP007752   | <i>tet(O)</i>       | tetracycline   |
| <i>Cj</i> | 112958  | Contig_8_186.212  | AC320     | CP007752   | <i>aph(3')-IIIa</i> | aminoglycoside |
| <i>Cj</i> | 112930  | Contig_73_233.894 | AC320     | CP013035   | <i>tet(O)</i>       | tetracycline   |
| <i>Cj</i> | 112930  | Contig_73_233.894 | AC320     | CP013035   | <i>aph(3')-IIIa</i> | aminoglycoside |
| <i>Cj</i> | 112961  | Contig_33_281.273 | AC321     | CP045046   | <i>tet(O)</i>       | tetracycline   |
| <i>Cj</i> | 112961  | Contig_33_281.273 | AC321     | CP045046   | <i>aph(3')-IIIa</i> | aminoglycoside |
| <i>Cj</i> | 112924  | Contig_45_189.151 | AC320     | CP017416   | <i>tet(O)</i>       | tetracycline   |
| <i>Cj</i> | 112924  | Contig_45_189.151 | AC320     | CP017416   | <i>aph(3')-IIIa</i> | aminoglycoside |
| <i>Cj</i> | 112167  | Contig_7_131.203  | AE190     | CP044174   | <i>tet(O)</i>       | tetracycline   |
| <i>Cj</i> | 112981  | Contig_16_105.628 | AC320     | AY394561   | <i>tet(O)</i>       | tetracycline   |
| <i>Cj</i> | 112927  | Contig_20_165.944 | AE015     | CP007184   | <i>tet(O)</i>       | tetracycline   |
| <i>Cj</i> | 112927  | Contig_20_165.944 | AE015     | CP007184   | <i>aph(3')-IIIa</i> | aminoglycoside |

|           |        |                       |                                 |          |                     |                |
|-----------|--------|-----------------------|---------------------------------|----------|---------------------|----------------|
|           |        |                       | novel_a7ef41ed<br>15871c6b12255 |          |                     |                |
| <i>Cj</i> | 113230 | Contig_7_211.859      | 249eb28cb44                     | MK251542 | <i>tet(O)</i>       | tetracycline   |
| <i>Cc</i> | 112127 | Contig_1_244.183_Circ | AC320                           | CP017418 | <i>tet(O)</i>       | tetracycline   |
| <i>Cj</i> | 113015 | Contig_21_539.177     | AC321                           | CP045046 | <i>tet(O)</i>       | tetracycline   |
| <i>Cj</i> | 113015 | Contig_21_539.177     | AC321                           | CP045046 | <i>aph(3')-IIIa</i> | aminoglycoside |

“p\_cluster”: MOB-Suite plasmid cluster; “p\_neighbor”: accession number of the Mash distance nearest neighbor of the plasmid. *Cj*

and *Cc*: *Campylobacter jejuni* and *coli*, respectively.

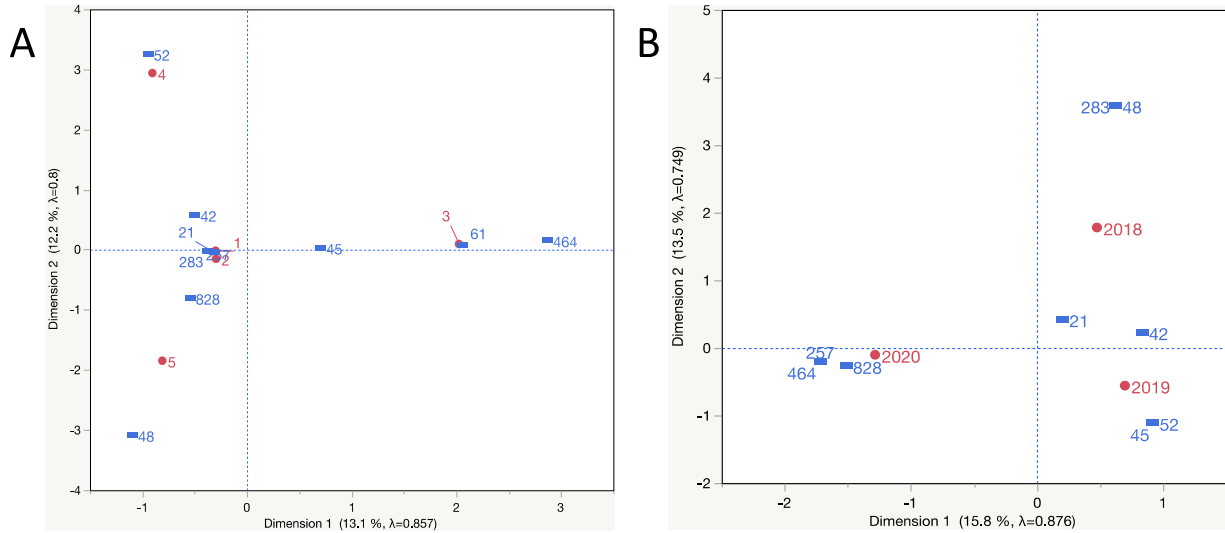

**Supplemental Figure 1.** Multi-correspondence analysis of clonal complexes (CC; blue label) by farm clusters (1-5; red label in Figure 1A) and year of collection (2018-2020; red label in Figure 1B). The distance between the CC indicates the likeliness that these CC can be found within the same farm cluster or year of collection. The distance between the farm clusters or the year of collection indicates the CC profile similarity between the farm clusters or years of collection.

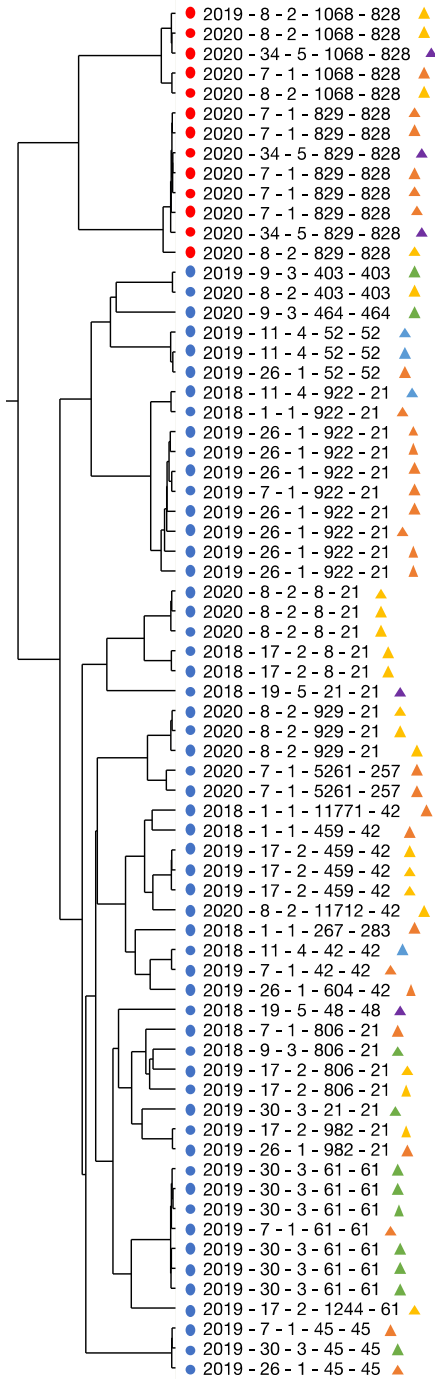

**Supplemental Figure 2.** Core-genome multi locus sequence typing (cgMLST) profile among the 69 *Campylobacter* isolated from dairy manure in North East Ohio. The tree was generated based on the cgMLST data. Each row indicates a specific *Campylobacter* isolate (year of collection - farm ID - farm cluster - sequence type - clonal complex). Blue and red circles indicate *Campylobacter jejuni* and *coli*, respectively. Colored triangles are associated with the farm cluster number; Orange, yellow, green, blue and purple triangles indicate farm cluster 1 to 5, respectively.

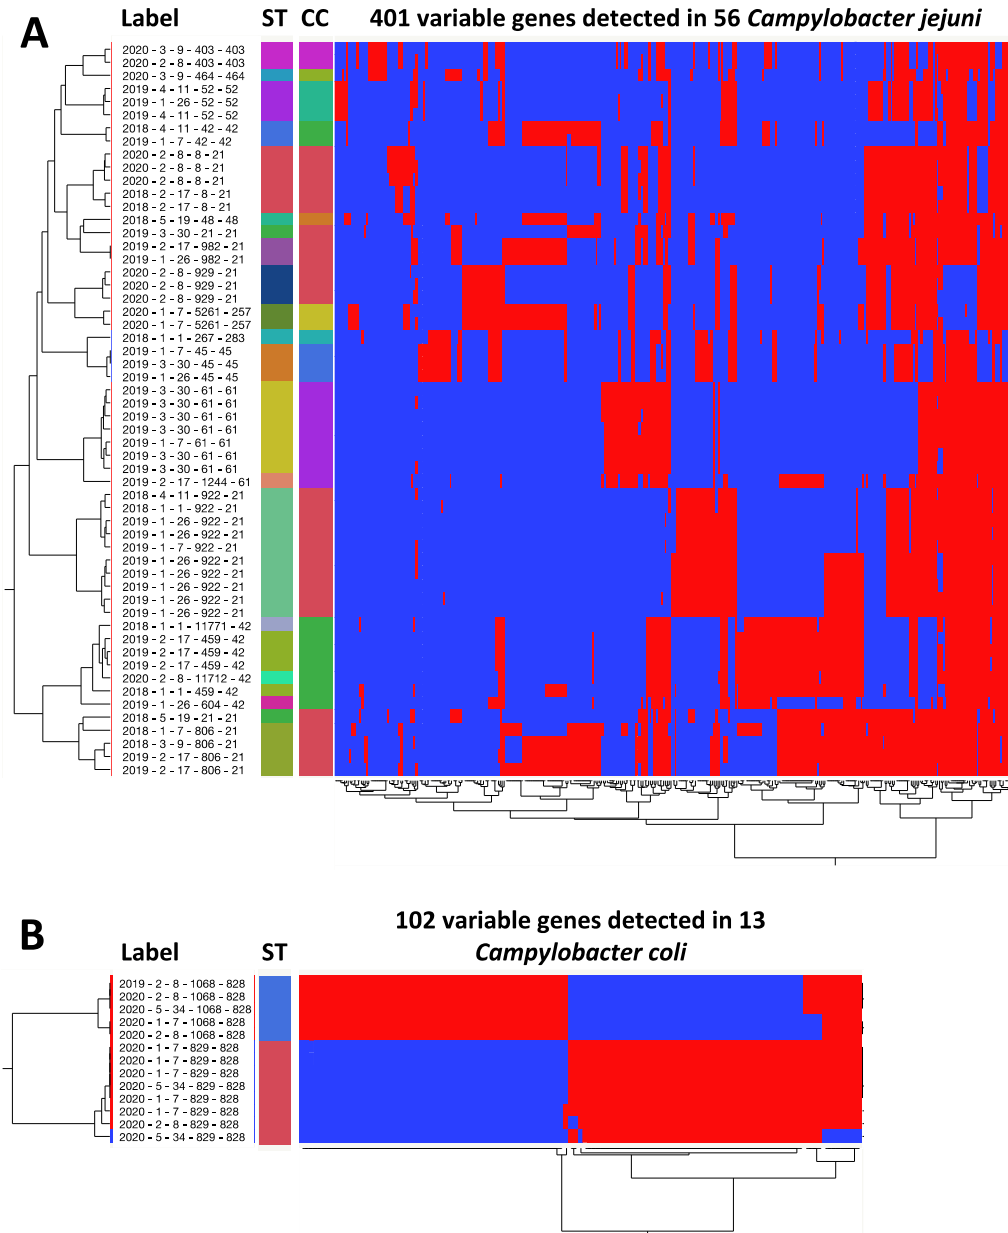

**Supplemental Figure 3.** Variable-genome profile among the 69 *Campylobacter* isolated from dairy manure in North East Ohio. A) Variable-genome profile of the 56 *C. jejuni* (n=401 variable genes) and B) variable-genome profile of the 13 *C. coli* isolates (n= 102 variable genes). The figures were generated based on the presence/absence of annotated genes (red and blue cells, respectively) using a Ward’s hierarchical clustering analysis in JMP Pro 16 (SAS, Cary, NC). Each row indicates a specific *Campylobacter* isolate (year of collection - farm cluster - farm ID - sequence type [ST]- clonal complex [CC]). Colored cells in the first column are associated with the ST number, while colored cells in the second column are associated with the CC number. No CC column was added to the *C. coli* figure given all isolates belongs to CC-828. Tree on the Y axis indicates the distribution of the *Campylobacter* isolates based on their variable genome profile, while the Tree on the X axis indicates the distribution of the protein-encoding genes based on their presence/absence on the *Campylobacter* isolates.

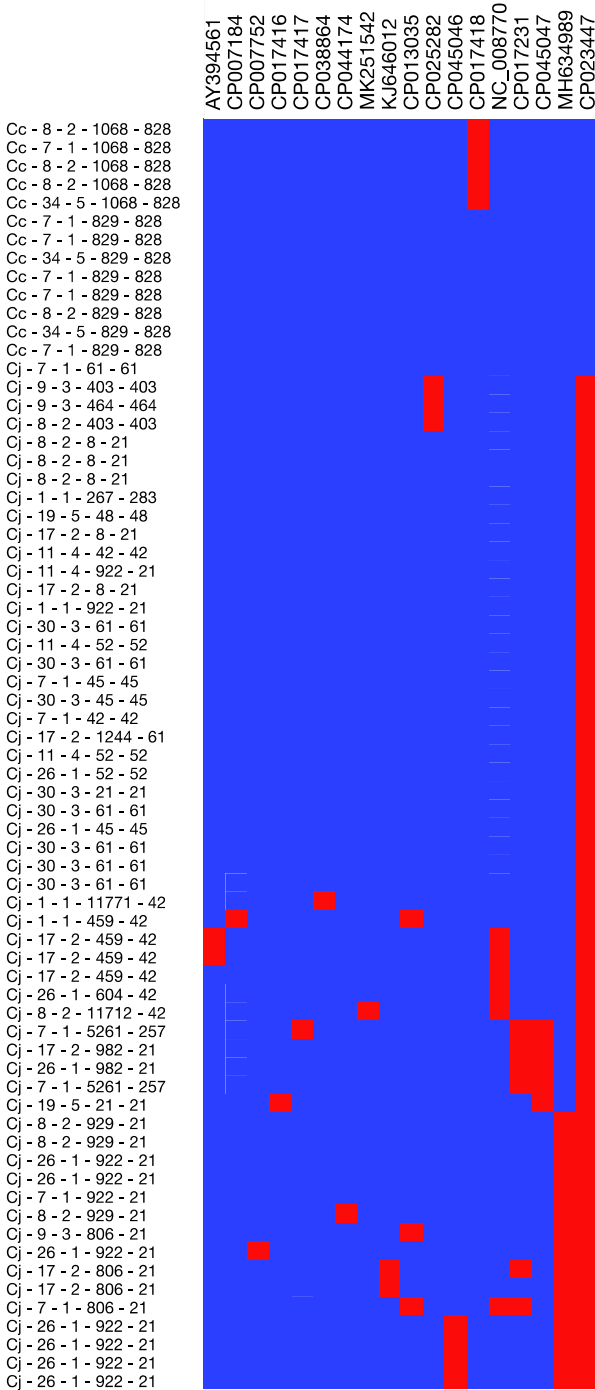

**Supplemental Figure 4.** Plasmid composition in the 69 *Campylobacter* isolated from dairy manure. Red and blue cells represent presence and absence of the designated plasmid (column), respectively. Each row indicates a specific *Campylobacter* isolate (species - farm ID - farm cluster - sequence type - clonal complex). *Cj* and *Cc*: *Campylobacter jejuni* and *coli*, respectively. Only *C. coli* ST-1069 CC-828 isolates (n=5) possessed plasmid accession number CP017418 (also called pMTVDSCj13-1). Interestingly, no plasmid was detected in *C. coli* ST-829 CC-828 isolates (n=8). All *C. jejuni* isolates (n=56) possessed the plasmid accession number CP023447 (also called pJc100). Most *C. jejuni* CC-21 (n=15/26) including ST-929 (n=3/3), ST-



922 (n=8/10) and ST-806 (n=4/4) possessed the plasmid accession number MH634989 (also called pCCDM18S1). *C. jejuni* CC-21 ST-922 (n=4/10) also possessed the plasmid accession number CP045046 (also called p20827S). Most *C. jejuni* ST-459 CC-42 (n=3/4) possessed the plasmid accession number NC\_008770 (also called pVir). All *C. jejuni* ST-5261 CC-257 (n=2) and ST-982 CC-21 (n=2) possessed the plasmid accession number CP045047 (also called p20827S) and CP017231 (also called pFORC46.2). All *C. jejuni* ST-403 CC-403 (n=2) and ST-464 CC-464 (n=1) possessed the plasmid accession number CP025282 (also called pCOS503).
